# Supplementary material for: Rifampicin tolerance and growth fitness among isoniazid-resistant clinical Mycobacterium tuberculosis isolates from a longitudinal study
Source: eLife. 2024 Sep 9;13:RP93243. doi: 10.7554/eLife.93243 (PMC11383526; doi:10.7554/eLife.93243)
Supplement: Supplementary file 2. [file elife-93243-supp2.xlsx]

## Sheet: raw data
Index	Archive	Time_point	INH-Suceptibility	INH-R-sequential isolates	Sample-ID	RIF_MGIT_DST	INH_MGIT_DST	RIF_Mykrobe	INH_Mykrobe	MIC_INH	MIC_RIF	mpn_T0_15days	mpn_T0_15days_log10	mpn_T2_15days	mpn_T2_15days_log10	mpn_T5_15days	mpn_T5_15days_log10	Survival_T2_15days	Survival_T5_15days	MDK_90_15day_new	MDK_99_15day_new	MDK_99_99_15day_new	mpn_T0_30days	mpn_T2_30days	mpn_T5_30days	Survival_T2_30days	Survival_T5_30days	mpn_T0_60days	mpn_T0_60days_log10	mpn_T2_60days	mpn_T2_60days_log10	mpn_T5_60days	mpn_T5_60days_log10	Survival_T2_60days	Survival_T5_60days	MDK_90_60day_new	MDK_99_60day_new	MDK_99_99_60day_new	Tolerant_level_D2_15	Tolerant_level_D5_15	Tolerant_level_D2_60	Tolerant_level_D5_60	Relative_growth_T0	Relative_growth_T2	Relative_growth_T5	Time_to_0.4	INH_mutation
1	17027	0M	IR	IR-BL	IR1	S	R	S	R	3.2	0.12	230000	5.36173	230	2.36173	230	2.36173	0.001	0.001	0.666667	1.33333	6	23000000	230000	2300	0.01	0.0001	23000000	7.36173	6100000	6.78533	130000	5.11394	0.265217	0.00565217	2.76033	4.55525	6	Low	Medium	Medium	Low	0.01	3.77049e-05	0.00176923	13	katG_S315X
2	17112	0M	IR	IR-BL	IR2	S	R	S	R	3.2	0.03	230000	5.36173	230	2.36173	230	2.36173	0.001	0.001	0.666667	1.33333	6	23000000	23000	230	0.001	1e-05	23000000	7.36173	6100000	6.78533	61000	4.78533	0.265217	0.00265217	2.6354	4.1354	6	Low	Medium	Medium	Low	0.01	3.77049e-05	0.00377049	14	katG_S315X
3	17436	0M	IR	IR-BL	IR3	S	R	S	R	0.4	0.06	230000	5.36173	2300	3.36173	230	2.36173	0.01	0.001	1	2	6	4900000	230000	2300	0.0469388	0.000469388	4900000	6.6902	2300000	6.36173	490000	5.6902	0.469388	0.1	5	6	6	Medium	Medium	High	Medium	0.0469388	0.001	0.000469388	11	katG_S315X
4	17705	0M	IR	IR-BL	IR4	S	R	S	R	6.4	0.06	2300000	6.36173	23000	4.36173	23000	4.36173	0.01	0.01	1	2	6	23000000	2300000	230000	0.1	0.01	23000000	7.36173	23000000	7.36173	2300000	6.36173	1	0.1	5	6	6	Medium	Medium	High	Medium	0.1	0.001	0.01	35	inhA_I21T
5	18124	0M	IR	IR-BL	IR5	S	R	S	R	3.2	0.12	23000	4.36173	23000	4.36173	23000	4.36173	1	1	6	6	6	23000000	2300000	490000	0.1	0.0213043	23000000	7.36173	6100000	6.78533	1300000	6.11394	0.265217	0.0565217	3.89281	6	6	High	High	Medium	Medium	0.001	0.00377049	0.0176923	24	katG_S315X
6	18499	0M	IR	IR-BL	IR6	S	R			3.2	0.06	23000	4.36173	230	2.36173	230	2.36173	0.01	0.01	1	2	6	2300000	2300	2300	0.001	0.001	23000000	7.36173	230000	5.36173	230000	5.36173	0.01	0.01	1	2	6	Medium	Medium	Low	Medium	0.001	0.001	0.001	15	katG_S315X
7	19394	0M	IR	IR-BL	IR7	S	R	S	R	1.6	0.06	230000	5.36173	23000	4.36173	230	2.36173	0.1	0.001	2	3.5	6	6100000	610000	61000	0.1	0.01	6100000	6.78533	2300000	6.36173	2300000	6.36173	0.377049	0.377049	6	6	6	Medium	Medium	Medium	High	0.0377049	0.01	0.0001	11	katG_S315X
8	20235	0M	IR	IR-BL	IR8	S	R	S	R	3.2	0.12	230000	5.36173	2300	3.36173	23	1.36173	0.01	0.0001	1	2	5	610000	230000	23	0.377049	3.77049e-05	NA	#VALUE!	NA	#VALUE!	NA	#VALUE!			#VALUE!	#VALUE!	#VALUE!	Medium	Low						19	katG_S315X
9	20232	0M	IR	IR-BL	IR9	S	R	S	R	3.2	0.12	2300000	6.36173	23000	4.36173	230	2.36173	0.01	0.0001	1	2	5	6100000	230000	230	0.0377049	3.77049e-05	NA	#VALUE!	NA	#VALUE!	NA	#VALUE!			#VALUE!	#VALUE!	#VALUE!	Medium	Low						19	katG_S315X
10	20948	0M	IR	IR-BL	IR10	S	R	S	R	3.2	0.25	230000	5.36173	2300	3.36173	23000	4.36173	0.01	0.1	1	2	6	6100000	230000	6100000	0.0377049	1	23000000	7.36173	6100000	6.78533	6100000	6.78533	0.265217	0.265217	6	6	6	Medium	High	Medium	High	0.01	0.000377049	0.00377049	19	katG_S315X
11	20951	0M	IR	IR-BL	IR11	S	R	S	R	0.4	0.25	230000	5.36173	2300	3.36173	23000	4.36173	0.01	0.1	1	2	6	610000	61000	2300000	0.1	3.77049	23000000	7.36173	6100000	6.78533	6100000	6.78533	0.265217	0.265217	6	6	6	Medium	High	Medium	High	0.01	0.000377049	0.00377049	19	fabG1_C-15X
12	20877	0M	IR	IR-BL	IR12	S	R	S	R	3.2	0.12	230000	5.36173	230	2.36173	230	2.36173	0.001	0.001	0.666667	1.33333	6	23000000	230000	230	0.01	1e-05	23000000	7.36173	23000000	7.36173	230000	5.36173	1	0.01	3.5	5	6	Low	Medium	High	Medium	0.01	1e-05	0.001	14	katG_S315X
13	20874	0M	IR	IR-BL	IR13	S	R	S	R	1.6	0.12	23000	4.36173	2300	3.36173	2300	3.36173	0.1	0.1	2	6	6	2300000	23000	23000	0.01	0.01	23000000	7.36173	2300000	6.36173	2300000	6.36173	0.1	0.1	2	6	6	Medium	High	Medium	Medium	0.001	0.001	0.001	15	katG_S315X
14	20944	0M	IR	IR-BL	IR14	S	R	S	R	1.6	0.06	230000	5.36173	2300	3.36173	2300	3.36173	0.01	0.01	1	2	6	2300000	23000	230000	0.01	0.1	230000000	8.36173	230000	5.36173	6100000	6.78533	0.001	0.0265217	0.666667	1.33333	6	Medium	Medium	Low	Medium	0.001	0.01	0.000377049	22	katG_S315X
15	21096	0M	IR	IR-BL	IR15	S	R	S	R	1.6	0.06	23000	4.36173	2300	3.36173	230	2.36173	0.1	0.01	2	5	6	230000	610000	61000	2.65217	0.265217	23000000	7.36173	6100000	6.78533	230000	5.36173	0.265217	0.01	2.89267	5	6	Medium	Medium	Medium	Medium	0.001	0.000377049	0.001	24	katG_S315X
16	21098	0M	IR	IR-BL	IR16	S	R	S	R	3.2	0.06	230000	5.36173	6100	3.78533	23000	4.36173	0.0265217	0.1	1.26872	6	6	2300000	230000	23000000	0.1	10	23000000	7.36173	23000000	7.36173	23000000	7.36173	1	1	6	6	6	Medium	High	High	High	0.01	0.000265217	0.001	19	katG_S315X
17	21465	0M	IR	IR-BL	IR17	S	R	S	R	6.4	0.06	230000	5.36173	230	2.36173	230	2.36173	0.001	0.001	0.666667	1.33333	6	2300000	6100	230000	0.00265217	0.1	61000000	7.78533	2300000	6.36173	6100000	6.78533	0.0377049	0.1	1.40489	6	6	Low	Medium	Medium	Medium	0.00377049	0.0001	3.77049e-05	19	katG_S315X
18	21466	0M	IR	IR-BL	IR18	S	R	S	R	3.2	0.12	230000	5.36173	2300	3.36173	23000	4.36173	0.01	0.1	1	2	6	6100000	23000	6100000	0.00377049	1	61000000	7.78533	610000	5.78533	6100000	6.78533	0.01	0.1	1	2	6	Medium	High	Low	Medium	0.00377049	0.00377049	0.00377049	19	katG_S315X
19	22325	0M	IR	IR-BL	IR19	S	R	S	R	6.4	0.25	230000	5.36173	2300	3.36173	2300	3.36173	0.01	0.01	1	2	6	2300000	2300	23000	0.001	0.01	6100000	6.78533	23000	4.36173	2300000	6.36173	0.00377049	0.377049	0.825218	1.65044	6	Medium	Medium	Low	High	0.0377049	0.1	0.001	19	katG_S315X
20	22331	0M	IR	IR-BL	IR20	S	R	S	R	0.4	0.06	610000	5.78533	2300	3.36173	2300	3.36173	0.00377049	0.00377049	0.825218	1.65044	6	23000000	61000	610000	0.00265217	0.0265217	230000000	8.36173	6100000	6.78533	2300000	6.36173	0.0265217	0.01	1.26872	5	6	Low	Medium	Low	Medium	0.00265217	0.000377049	0.001	19	fabG1_C-15X
21	22511	0M	IR	IR-BL	IR21	S	R	S	R	0.4	0.12	23000000	7.36173	610000	5.78533	23000	4.36173	0.0265217	0.001	1.26872	2.89267	6	23000000	23000000	230000	1	0.01	23000000	7.36173	23000000	7.36173	2300000	6.36173	1	0.1	5	6	6	Medium	Medium	High	Medium	1	0.0265217	0.01	15	fabG1_C-15X
22	16939	0M	IR	IR-BL	IR22	s	r	S	R			230000	5.36173	23000	4.36173	2300	3.36173	0.1	0.01	2	5	6	23000000	2300000	61000	0.1	0.00265217	NA	#VALUE!	NA	#VALUE!	NA	#VALUE!			#VALUE!	#VALUE!	#VALUE!	Medium	Medium						14	katG_S315X
23	17034	0M	IR	IR-BL	IR23	S	R	S	R	3.2	0.06	23000	4.36173	2300	3.36173	230	2.36173	0.1	0.01	2	5	6	2300000	61000	2300	0.0265217	0.001	2300000	6.36173	2300000	6.36173	230000	5.36173	1	0.1	5	6	6	Medium	Medium	High	Medium	0.01	0.001	0.001	12	katG_S315X
24	17702	0M	IR	IR-BL	IR24	S	R	S	R	3.2	0.06	230000	5.36173	2300	3.36173	230	2.36173	0.01	0.001	1	2	6	2300000	23000	230	0.01	0.0001	23000000	7.36173	230000	5.36173	6100	3.78533	0.01	0.000265217	1	2	6	Medium	Medium	Low	Low	0.01	0.01	0.0377049	15	katG_S315X
25	17700	0M	IR	IR-BL	IR25	S	R	S	R	3.2	0.06	610000	5.78533	61000	4.78533	6100	3.78533	0.1	0.01	2	5	6	6100000	2300000	230000	0.377049	0.0377049	6100000	6.78533	2300000	6.36173	230000	5.36173	0.377049	0.0377049	3.72919	6	6	Medium	Medium	Medium	Medium	0.1	0.0265217	0.0265217	19	katG_S315X
26	18388	0M	IR	IR-BL	IR26	S	R	S	R	3.2	0.12	230000	5.36173	2300	3.36173	230	2.36173	0.01	0.001	1	2	6	2300000	230000	23000	0.1	0.01	23000000	7.36173	2300000	6.36173	23000000	7.36173	0.1	1	2	6	6	Medium	Medium	Medium	High	0.01	0.001	1e-05	15	katG_S315X
27	18228	0M	IR	IR-BL	IR27	S	R	S	R	3.2	0.06	230000	5.36173	23000	4.36173	230	2.36173	0.1	0.001	2	3.5	6	2300000	230000	23000	0.1	0.01	23000000	7.36173	23000000	7.36173	2300000	6.36173	1	0.1	5	6	6	Medium	Medium	High	Medium	0.01	0.001	0.0001	15	katG_S315X
28	19536	0M	IR	IR-BL	IR28	S	R	S	R	1.6	0.06	230000	5.36173	23000	4.36173	230	2.36173	0.1	0.001	2	3.5	6	2300000	2300000	63000	1	0.0273913	61000000	7.78533	12000000	7.07918	610000	5.78533	0.196721	0.01	2.68134	5	6	Medium	Medium	Medium	Medium	0.00377049	0.00191667	0.000377049	15	katG_S315X
29	19831	0M	IR	IR-BL	IR29	S	R	S	R	1.6	0.03	230000	5.36173	2300	3.36173	230	2.36173	0.01	0.001	1	2	6	2300000	230000	23000	0.1	0.01	2300000	6.36173	610000	5.78533	230000	5.36173	0.265217	0.1	5	6	6	Medium	Medium	Medium	Medium	0.1	0.00377049	0.001	12	katG_S315X
30	21043	0M	IR	IR-BL	IR30	S	R	S	R	3.2	0.06	610000	5.78533	61000	4.78533	2300	3.36173	0.1	0.00377049	2	4.10733	6	61000000	23000000	610000	0.377049	0.01	61000000	7.78533	23000000	7.36173	2300000	6.36173	0.377049	0.0377049	3.72919	6	6	Medium	Medium	Medium	Medium	0.01	0.00265217	0.001	15	katG_S315X
31	19894	0M	IR	IR-BL	IR31	S	R	S	R	1.6	0.03	230000	5.36173	23000	4.36173	2300	3.36173	0.1	0.01	2	5	6	61000000	6100000	61000	0.1	0.001	61000000	7.78533	61000000	7.78533	610000	5.78533	1	0.01	3.5	5	6	Medium	Medium	High	Medium	0.00377049	0.000377049	0.00377049	15	katG_S315X
32	19829	0M	IR	IR-BL	IR32	S	R	S	R	3.2	0.06	23000	4.36173	2300	3.36173	230	2.36173	0.1	0.01	2	5	6	2300000	23000	2300	0.01	0.001	23000000	7.36173	2300000	6.36173	230000	5.36173	0.1	0.01	2	5	6	Medium	Medium	Medium	Medium	0.001	0.001	0.001	15	katG_S315X
33	19533	0M	IR	IR-BL	IR33	S	R	S	R	3.2	0.06	23000	4.36173	230	2.36173	230	2.36173	0.01	0.01	1	2	6	23000000	23000	2300	0.001	0.0001	23000000	7.36173	23000	4.36173	6100	3.78533	0.001	0.000265217	0.666667	1.33333	6	Medium	Medium	Low	Low	0.001	0.01	0.0377049	15	katG_S315X
34	20517	0M	IR	IR-BL	IR34	S	R	S	R	3.2	0.12	230000	5.36173	230	2.36173	230	2.36173	0.001	0.001	0.666667	1.33333	6	2300000	23000	2300	0.01	0.001	13000000	7.11394	610000	5.78533	61000	4.78533	0.0469231	0.00469231	1.50533	4.01416	6	Low	Medium	Medium	Low	0.0176923	0.000377049	0.00377049	15	katG_S315X
35	20938	0M	IR	IR-BL	IR35	S	R	S	R	1.6	0.06	230000	5.36173	23000	4.36173	2300	3.36173	0.1	0.01	2	5	6	23000000	23000000	610000	1	0.0265217	NA	#VALUE!	NA	#VALUE!	NA	#VALUE!			#VALUE!	#VALUE!	#VALUE!	Medium	Medium						14	katG_S315X
36	20947	0M	IR	IR-BL	IR36	S	R	S	R	3.2	0.06	230000	5.36173	23000	4.36173	230	2.36173	0.1	0.001	2	3.5	6	61000000	2300000	610000	0.0377049	0.01	61000000	7.78533	13000000	7.11394	2300000	6.36173	0.213115	0.0377049	3.31058	6	6	Medium	Medium	Medium	Medium	0.00377049	0.00176923	0.0001	15	katG_S315X
37	21698	0M	IR	IR-BL	IR37	S	R	S	R	3.2	0.03	23000	4.36173	2300	3.36173	230	2.36173	0.1	0.01	2	5	6	230000	2300	230	0.01	0.001	2300000	6.36173	61000	4.78533	2300	3.36173	0.0265217	0.001	1.26872	2.89267	6	Medium	Medium	Low	Low	0.01	0.0377049	0.1	15	katG_S315X
38	21696	0M	IR	IR-BL	IR38	S	R	S	R	3.2	0.25	230000	5.36173	2300	3.36173	230	2.36173	0.01	0.001	1	2	6	6100000	230000	230	0.0377049	3.77049e-05	6100000	6.78533	230000	5.36173	6100	3.78533	0.0377049	0.001	1.40489	3.09693	6	Medium	Medium	Medium	Low	0.0377049	0.01	0.0377049	34	katG_S315X
39	22515	0M	IR	IR-BL	IR39	S	R	S	R	6.4	0.12	230000	5.36173	2300	3.36173	230	2.36173	0.01	0.001	1	2	6	2300000	23000	2300	0.01	0.001	23000000	7.36173	2300000	6.36173	230000	5.36173	0.1	0.01	2	5	6	Medium	Medium	Medium	Medium	0.01	0.001	0.001	15	katG_S315X
40	22656	5M	IR	IR-CP	IR40	S	R	S	R	12.8	0.25	6100000	6.78533	61000	4.78533	23000	4.36173	0.01	0.00377049	1	2	6	61000000	230000	23000000	0.00377049	0.377049	61000000	7.78533	6100000	6.78533	23000000	7.36173	0.1	0.377049	2	6	6	Medium	Medium	Medium	High	0.1	0.01	0.001	19	katG_S315X
41	23445	8M	IR	IR-CP	IR41	S	R	S	R	6.4	0.12	2300000	6.36173	23000	4.36173	23000	4.36173	0.01	0.01	1	2	6	61000000	2300000	23000000	0.0377049	0.377049	230000000	8.36173	61000000	7.78533	23000000	7.36173	0.265217	0.1	5	6	6	Medium	Medium	Medium	Medium	0.01	0.000377049	0.001	19	katG_S315X
42	21927	0M	IR	IR-BL	IR42	S	R					6100000	6.78533	230000	5.36173	6100	3.78533	0.0377049	0.001	1.40489	3.09693	6	23000000	2300000	230000	0.1	0.01	23000000	7.36173	6100000	6.78533	2300000	6.36173	0.265217	0.1	5	6	6	Medium	Medium	Medium	Medium	0.265217	0.0377049	0.00265217	#N/A	NA
43	20164	18M	IR	IR-CP	IR43	S	R	S	R	3.2	0.06	23000	4.36173	230	2.36173	23	1.36173	0.01	0.001	1	2	6	230000	6100	23	0.0265217	0.0001	610000	5.78533	230000	5.36173	23	1.36173	0.377049	3.77049e-05	2.4323	3.1823	4.6823	Medium	Medium	Medium	Low	0.0377049	0.001	1	22	katG_S315X
44	17532	1M	IR	IR-IP	IR44	S	R	S	R	3.2	0.25	230000	5.36173	23000	4.36173	23000	4.36173	0.1	0.1	2	6	6	23000000	6100000	230000	0.265217	0.01	23000000	7.36173	23000000	7.36173	2300000	6.36173	1	0.1	5	6	6	Medium	High	High	Medium	0.01	0.001	0.01	19	katG_S315X
45	18416	8M	IR	IR-CP	IR45	S	R	S	R	3.2	0.12	230000	5.36173	230	2.36173	230	2.36173	0.001	0.001	0.666667	1.33333	6	23000000	230	230	1e-05	1e-05	61000000	7.78533	230	2.36173	230	2.36173	3.77049e-06	3.77049e-06	0.368759	0.737517	1.47503	Low	Medium	Low	Low	0.00377049	1	1	28	katG_S315X
46	18809	8M	IR	IR-CP	IR46	S	R			3.2	0.25	23000	4.36173	23000	4.36173	230000	5.36173	1	10	6	6	6	2300000	4900000	2300000	2.13043	1	23000000	7.36173	230000000	8.36173	61000000	7.78533	10	2.65217	6	6	6	High	High	High	High	0.001	0.0001	0.00377049	19	NA
47	20645	12M	IR	IR-CP	IR47	S	R	S	R	3.2	0.12	610000	5.78533	2300	3.36173	230	2.36173	0.00377049	0.000377049	0.825218	1.65044	6	230000000	230000	61000	0.001	0.000265217	230000000	8.36173	610000	5.78533	230000	5.36173	0.00265217	0.001	0.776278	1.55256	6	Low	Low	Low	Low	0.00265217	0.00377049	0.001	15	katG_S315X
48	19235	1M	IR	IR-IP	IR48	S	R	S	R	1.6	0.06	230000	5.36173	23000	4.36173	2300	3.36173	0.1	0.01	2	5	6	230000	23000	6100	0.1	0.0265217	610000	5.78533	23000	4.36173	6100	3.78533	0.0377049	0.01	1.40489	5	6	Medium	Medium	Medium	Medium	0.377049	1	0.377049	22	katG_S315X
49	20256	8M	IR	IR-CP	IR49	S	R	S	R	6.4	0.25	23000	4.36173	230	2.36173	23	1.36173	0.01	0.001	1	2	6	230000	230	23	0.001	0.0001	230000	5.36173	230	2.36173	23	1.36173	0.001	0.0001	0.666667	1.33333	5	Medium	Medium	Low	Low	0.1	1	1	22	katG_S315X
50	22193	18M	IR	IR-CP	IR50	S	R	S	R	6.4	0.12	23000	4.36173	2300	3.36173	23	1.36173	0.1	0.001	2	3.5	6	230000	2300	23	0.01	0.0001	230000	5.36173	2300	3.36173	23	1.36173	0.01	0.0001	1	2	5	Medium	Medium	Low	Low	0.1	1	1	19	katG_S315X
51	20324	1M	IR	IR-IP	IR51	S	R	S	R	6.4	0.5	610000	5.78533	61000	4.78533	230	2.36173	0.1	0.000377049	2	3.23783	6	61000000	2300000	230000	0.0377049	0.00377049	61000000	7.78533	6100000	6.78533	1300000	6.11394	0.1	0.0213115	2	6	6	Medium	Low	Medium	Medium	0.01	0.01	0.000176923	15	katG_S315X
52	20651	2M	IR	IR-IP	IR52	S	R	S	R	3.2	0.06	230000	5.36173	23000	4.36173	2300	3.36173	0.1	0.01	2	5	6	61000000	2300000	230000	0.0377049	0.00377049	61000000	7.78533	6100000	6.78533	610000	5.78533	0.1	0.01	2	5	6	Medium	Medium	Medium	Medium	0.00377049	0.00377049	0.00377049	15	katG_S315X
53	22196	12M	IR	IR-CP	IR53	S	R	S	R	3.2	0.12	610000	5.78533	230000	5.36173	23000	4.36173	0.377049	0.0377049	3.72919	6	6	23000000	2300000	2300000	0.1	0.1	23000000	7.36173	2300000	6.36173	2300000	6.36173	0.1	0.1	2	6	6	High	High	Medium	Medium	0.0265217	0.1	0.01	15	katG_S315X
54	20926	8M	IR	IR-CP	IR54	S	R	S	R	6.4	0.12	610000	5.78533	23000	4.36173	6100	3.78533	0.0377049	0.01	1.40489	5	6	23000000	610000	610000	0.0265217	0.0265217	23000000	7.36173	6100000	6.78533	6100000	6.78533	0.265217	0.265217	6	6	6	Medium	Medium	Medium	High	0.0265217	0.00377049	0.001	15	katG_S315X
55	19777	5M	IR	IR-CP	IR55	S	R	S	R	3.2	0.12	230000	5.36173	23000	4.36173	230	2.36173	0.1	0.001	2	3.5	6	23000000	610000	610000	0.0265217	0.0265217	23000000	7.36173	2300000	6.36173	610000	5.78533	0.1	0.0265217	2	6	6	Medium	Medium	Medium	Medium	0.01	0.01	0.000377049	19	katG_S315X
56	24897	24M	IR	IR-CP	IR56	S	R	S	R	3.2	0.12	23000	4.36173	2300	3.36173	230	2.36173	0.1	0.01	2	5	6	610000	23000	6100	0.0377049	0.01	6100000	6.78533	23000	4.36173	23000	4.36173	0.00377049	0.00377049	0.825218	1.65044	6	Medium	Medium	Low	Low	0.00377049	0.1	0.01	19	katG_S315X
57	20644	1M	IR	IR-IP	IR57	S	R	S	R	1.6	0.06	230000	5.36173	23000	4.36173	23000	4.36173	0.1	0.1	2	6	6	23000000	2300000	610000	0.1	0.0265217	23000000	7.36173	23000000	7.36173	6100000	6.78533	1	0.265217	6	6	6	Medium	High	High	High	0.01	0.001	0.00377049	19	katG_S315X
58	22966	18M	IR	IR-CP	IR58	S	R	S	R	3.2	0.06	230000	5.36173	23000	4.36173	23000	4.36173	0.1	0.1	2	6	6	2300000	610000	230000	0.265217	0.1	230000000	8.36173	4900000	6.6902	6100000	6.78533	0.0213043	0.0265217	1.19651	6	6	Medium	High	Low	Medium	0.001	0.00469388	0.00377049	19	katG_S315X
59	20771	2M	IR	IR-IP	IR59	S	R	S	R	3.2	0.12	610000	5.78533	23000	4.36173	23000	4.36173	0.0377049	0.0377049	1.40489	6	6	2300000	230000	610000	0.1	0.265217	61000000	7.78533	4900000	6.6902	6100000	6.78533	0.0803279	0.1	1.82626	6	6	Medium	High	Medium	Medium	0.01	0.00469388	0.00377049	15	katG_S315X
60	22657	12M	IR	IR-CP	IR60	S	R	S	R	3.2	0.06	610000	5.78533	23000	4.36173	2300	3.36173	0.0377049	0.00377049	1.40489	3.72919	6	230000000	230000	23000	0.001	0.0001	230000000	8.36173	6100000	6.78533	610000	5.78533	0.0265217	0.00265217	1.26872	3.27081	6	Medium	Medium	Low	Low	0.00265217	0.00377049	0.00377049	15	katG_S315X
61	23836	12M	IR	IR-CP	IR61	S	R	S	R	3.2	0.06	610000	5.78533	230	2.36173	23	1.36173	0.000377049	3.77049e-05	0.58418	1.16836	3.72919	6100000	23000	23	0.00377049	3.77049e-06	61000000	7.78533	610000	5.78533	12000	4.07918	0.01	0.000196721	1	2	6	Low	Low	Low	Low	0.01	0.000377049	0.00191667	15	katG_S315X
62	25180	18M	IR	IR-CP	IR62			S	R			230000	5.36173	230	2.36173	230	2.36173	0.001	0.001	0.666667	1.33333	6	2300000	230	23000	0.0001	0.01	23000000	7.36173	610000	5.78533	61000	4.78533	0.0265217	0.00265217	1.26872	3.27081	6	Low	Medium	Low	Low	0.01	0.000377049	0.00377049	19	NA
63	21397	1M	IR	IR-IP	IR63	S	R			3.2	0.12	23000	4.36173	23000	4.36173	2300	3.36173	1	0.1	5	6	6	61000	23000	6100	0.377049	0.1	61000	4.78533	23000	4.36173	61000	4.78533	0.377049	1	6	6	6	High	High	Medium	High	0.377049	1	0.0377049	28	katG_S315X
64	24551	12M	IR	IR-CP	IR64	S	R	S	R	3.2	0.12	23000	4.36173	230	2.36173	230	2.36173	0.01	0.01	1	2	6	23000	230	230	0.01	0.01	23000	4.36173	230	2.36173	230	2.36173	0.01	0.01	1	2	6	Medium	Medium	Low	Medium	1	1	1	37	katG_S315X
65	22191	1M	IR	IR-IP	IR65	S	R	S	R	6.4	0.06	23000	4.36173	230	2.36173	230	2.36173	0.01	0.01	1	2	6	2300000	2300	23000	0.001	0.01	23000000	7.36173	2300000	6.36173	130000	5.11394	0.1	0.00565217	2	4.40426	6	Medium	Medium	Medium	Low	0.001	0.0001	0.00176923	19	katG_S315X
66	24550	12M	IR	IR-CP	IR66	S	R	S	R	6.4	0.12	23000	4.36173	6100	3.78533	23	1.36173	0.265217	0.001	2.52435	3.76217	6	6100000	230000	23	0.0377049	3.77049e-06	6100000	6.78533	2300000	6.36173	23	1.36173	0.377049	3.77049e-06	2.34584	2.94584	4.14584	High	Medium	Medium	Low	0.00377049	0.00265217	1	22	katG_S315X
67	18029	1M	IR	IR-IP	IR67	S	R	S	R			23000	4.36173	2300	3.36173	2300	3.36173	0.1	0.1	2	6	6	61000	23000	6100	0.377049	0.1	230000	5.36173	230000	5.36173	23000	4.36173	1	0.1	5	6	6	Medium	High	High	Medium	0.1	0.01	0.1	28	katG_S315X
68	18333	2M	IR	IR-IP	IR68	S	R	S	R			230000	5.36173	61000	4.78533	6100	3.78533	0.265217	0.0265217	3.27081	6	6	230000	230000	23000	1	0.1	230000	5.36173	610000	5.78533	61000	4.78533	2.65217	0.265217	6	6	6	High	High	High	High	1	0.1	0.1	37	katG_S315X
69	19399	0M	IR	IR-BL	IR69	S	R	S	R			610000	5.78533	23000	4.36173	230	2.36173	0.0377049	0.000377049	1.40489	2.8646	6	23000000	2300000	230000	0.1	0.01	23000000	7.36173	4900000	6.6902	4900000	6.6902	0.213043	0.213043	6	6	6	Medium	Low	Medium	High	0.0265217	0.00469388	4.69388e-05	8	katG_S315X
70	19893	0M	IR	IR-BL	IR70	S	R					230000	5.36173	2300	3.36173	23000	4.36173	0.01	0.1	1	2	6	2300000	61000	610000	0.0265217	0.265217	23000000	7.36173	23000000	7.36173	1300000	6.11394	1	0.0565217	4.40426	6	6	Medium	High	High	Medium	0.01	0.0001	0.0176923	19	NA
71	19773	1M	IR	IR-IP	IR71	S	R	S	R			230000	5.36173	2300	3.36173	61000	4.78533	0.01	0.265217	1	2	6	1300000	230000	490000	0.176923	0.376923	61000000	7.78533	4900000	6.6902	6100000	6.78533	0.0803279	0.1	1.82626	6	6	Medium	High	Medium	Medium	0.00377049	0.000469388	0.01	19	katG_S315X
72	21171	0M	IR	IR-BL	IR72	S	R	S	R			6100	3.78533	2300	3.36173	230	2.36173	0.377049	0.0377049	3.72919	6	6	6100	23000	61000	3.77049	10	6100	3.78533	61000	4.78533	61000	4.78533	10	10	6	6	6	High	High	High	High	1	0.0377049	0.00377049	36	fabG1_C-15X
73	21174	0M	IR	IR-BL	IR73	S	R	S	R			2300	3.36173	2300	3.36173	230	2.36173	1	0.1	5	6	6	2300	2300	230	1	0.1	2300	3.36173	2300	3.36173	6100	3.78533	1	2.65217	6	6	6	High	High	High	High	1	1	0.0377049	37	katG_S315X
74	21756	0M	IR	IR-BL	IR74	S	R	S	R	3.2	0.06	23000	4.36173	2300	3.36173	23000	4.36173	0.1	1	2	6	6	610000	230000	230000	0.377049	0.377049	23000000	7.36173	230000	5.36173	6100000	6.78533	0.01	0.265217	1	2	6	Medium	High	Low	High	0.001	0.01	0.00377049	19	katG_S315X
75	17342	1M	IR	IR-IP	IR75	S	R	S	R			230000	5.36173	23000	4.36173	1300	3.11394	0.1	0.00565217	2	4.40426	6	2300000	2300000	610000	1	0.265217	61000000	7.78533	6100000	6.78533	610000	5.78533	0.1	0.01	2	5	6	Medium	Medium	Medium	Medium	0.00377049	0.00377049	0.00213115	19	katG_S315X
76	21048	18M	IR	IR-CP	IR76	S	R	S	R			230000	5.36173	23000	4.36173	23	1.36173	0.1	0.0001	2	3	5	23000000	230000	23	0.01	1e-06	23000000	7.36173	2300000	6.36173	23	1.36173	0.1	1e-06	2	2.6	3.8	Medium	Low	Medium	Low	0.01	0.01	1	19	inhA_I21T
77	18341	0M	IR	IR-BL	IR77	S	R					230000	5.36173	23000	4.36173	2300	3.36173	0.1	0.01	2	5	6	2300000	230000	61000	0.1	0.0265217	13000000	7.11394	2300000	6.36173	230000	5.36173	0.176923	0.0176923	2.74335	6	6	Medium	Medium	Medium	Medium	0.0176923	0.01	0.01	19	NA
78	19913	0M	IR	IR-BL	IR78			S	R			23000000	7.36173	6100000	6.78533	6100000	6.78533	0.265217	0.265217	6	6	6	23000000	6100000	6100000	0.265217	0.265217	23000000	7.36173	61000000	7.78533	6100000	6.78533	2.65217	0.265217	6	6	6	High	High	High	High	1	0.1	1	8	katG_S315X
79	20000	1M	IR	IR-IP	IR79	S	R	S	R			61000	4.78533	6100	3.78533	23000	4.36173	0.1	0.377049	2	6	6	2300000	230000	61000	0.1	0.0265217	23000000	7.36173	2300000	6.36173	230000	5.36173	0.1	0.01	2	5	6	Medium	High	Medium	Medium	0.00265217	0.00265217	0.1	19	katG_S315X
80	21233	8M	IR	IR-CP	IR80	S	R	S	R			230000	5.36173	2300	3.36173	2300	3.36173	0.01	0.01	1	2	6	6100000	230000	610000	0.0377049	0.1	6100000	6.78533	610000	5.78533	1300000	6.11394	0.1	0.213115	2	6	6	Medium	Medium	Medium	High	0.0377049	0.00377049	0.00176923	19	katG_S315X
81	20646	1M	IR	IR-IP	IR81	S	R			6.4	0.12	230000	5.36173	2300	3.36173	23000	4.36173	0.01	0.1	1	2	6	23000000	230000	230000	0.01	0.01	61000000	7.78533	2300000	6.36173	6100000	6.78533	0.0377049	0.1	1.40489	6	6	Medium	High	Medium	Medium	0.00377049	0.001	0.00377049	8	katG_S315X
82	20950	0M	IR	IR-BL	IR82	S	R			3.2	0.06	230000	5.36173	230	2.36173	2300	3.36173	0.001	0.01	0.666667	1.33333	6	23000000	61000	610000	0.00265217	0.0265217	23000000	7.36173	6100000	6.78533	610000	5.78533	0.265217	0.0265217	3.27081	6	6	Low	Medium	Medium	Medium	0.01	3.77049e-05	0.00377049	19	katG_S315X
83	23837	12M	IR	IR-CP	IR83	S	R	S	R	0.4	0.25	230000	5.36173	23000	4.36173	23000	4.36173	0.1	0.1	2	6	6	2300000	230000	230000	0.1	0.1	61000000	7.78533	2300000	6.36173	230000	5.36173	0.0377049	0.00377049	1.40489	3.72919	6	Medium	High	Medium	Low	0.00377049	0.01	0.1	19	fabG1_C-15X
84	21349	0M	IR	IR-BL	IR84	S	R	S	R			230000	5.36173	23000	4.36173	23000	4.36173	0.1	0.1	2	6	6	2300000	230000	61000	0.1	0.0265217	61000000	7.78533	610000	5.78533	230000	5.36173	0.01	0.00377049	1	2	6	Medium	High	Low	Low	0.00377049	0.0377049	0.1	19	fabG1_C-15X
85	25859	0M	IS	IS	IS1					0.05	0.06	2300000	6.36173	230000	5.36173	23000	4.36173	0.1	0.01	2	5	6	230000000	23000000	23000000	0.1	0.1	NA	#VALUE!	NA	#VALUE!	NA	#VALUE!			#VALUE!	#VALUE!	#VALUE!	Medium	Medium						14	NA
86	25912	0M	IS	IS	IS2					0.05	0.06	230000	5.36173	2300	3.36173	23000	4.36173	0.01	0.1	1	2	6	2300000	23000	2300000	0.01	1	23000000	7.36173	230000	5.36173	2300000	6.36173	0.01	0.1	1	2	6	Medium	High	Low	Medium	0.01	0.01	0.01	15	NA
87	26189	0M	IS	IS	IS3					0.025	0.06	6100000	6.78533	230000	5.36173	23000	4.36173	0.0377049	0.00377049	1.40489	3.72919	6	23000000	2300000	610000	0.1	0.0265217	23000000	7.36173	6100000	6.78533	610000	5.78533	0.265217	0.0265217	3.27081	6	6	Medium	Medium	Medium	Medium	0.265217	0.0377049	0.0377049	31	NA
88	26264	0M	IS	IS	IS4					0.025	0.12	2300000	6.36173	230000	5.36173	23000	4.36173	0.1	0.01	2	5	6	230000000	23000000	610000	0.1	0.00265217	NA	#VALUE!	NA	#VALUE!	NA	#VALUE!			#VALUE!	#VALUE!	#VALUE!	Medium	Medium						14	NA
89	26204	0M	IS	IS	IS5					0.025	0.5	23000	4.36173	230	2.36173	230	2.36173	0.01	0.01	1	2	6	610000	6100	23000	0.01	0.0377049	23000000	7.36173	610000	5.78533	23000	4.36173	0.0265217	0.001	1.26872	2.89267	6	Medium	Medium	Low	Low	0.001	0.000377049	0.01	17	NA
90	26652	0M	IS	IS	IS6					0.025	0.06	230000	5.36173	23000	4.36173	23000	4.36173	0.1	0.1	2	6	6	23000000	610000	230000	0.0265217	0.01	61000000	7.78533	13000000	7.11394	23000000	7.36173	0.213115	0.377049	6	6	6	Medium	High	Medium	High	0.00377049	0.00176923	0.001	21	NA
91	26705	0M	IS	IS	IS7					0.025	0.06	2300000	6.36173	23000	4.36173	23000	4.36173	0.01	0.01	1	2	6	61000000	2300000	230000	0.0377049	0.00377049	130000000	8.11394	61000000	7.78533	6100000	6.78533	0.469231	0.0469231	4.01416	6	6	Medium	Medium	High	Medium	0.0176923	0.000377049	0.00377049	17	NA
92	26550	0M	IS	IS	IS8					0.025	0.06	610000	5.78533	23000	4.36173	6100	3.78533	0.0377049	0.01	1.40489	5	6	6100000	2300000	230000	0.377049	0.0377049	13000000	7.11394	2300000	6.36173	2300000	6.36173	0.176923	0.176923	6	6	6	Medium	Medium	Medium	High	0.0469231	0.01	0.00265217	21	NA
93	26600	0M	IS	IS	IS9					0.025	0.06	2300000	6.36173	61000	4.78533	23000	4.36173	0.0265217	0.01	1.26872	5	6	2300000	2300000	230000	1	0.1	2300000	6.36173	23000000	7.36173	1300000	6.11394	10	0.565217	6	6	6	Medium	Medium	High	High	1	0.00265217	0.0176923	21	NA
94	26611	0M	IS	IS	IS10					0.025	0.06	230000	5.36173	230	2.36173	230	2.36173	0.001	0.001	0.666667	1.33333	6	2300000	23000	61000	0.01	0.0265217	2300000	6.36173	61000	4.78533	610000	5.78533	0.0265217	0.265217	1.26872	6	6	Low	Medium	Low	High	0.1	0.00377049	0.000377049	15	NA
95	26716	0M	IS	IS	IS11					0.025	0.06	61000	4.78533	23000	4.36173	6100	3.78533	0.377049	0.1	5	6	6	2300000	2300000	23000	1	0.01	23000000	7.36173	6100000	6.78533	2300000	6.36173	0.265217	0.1	5	6	6	High	High	Medium	Medium	0.00265217	0.00377049	0.00265217	21	NA
96	26722	0M	IS	IS	IS12					0.05	0.06	2300000	6.36173	23000	4.36173	23000	4.36173	0.01	0.01	1	2	6	61000000	2300000	230000	0.0377049	0.00377049	61000000	7.78533	6100000	6.78533	2300000	6.36173	0.1	0.0377049	2	6	6	Medium	Medium	Medium	Medium	0.0377049	0.00377049	0.01	17	NA
97	26622	0M	IS	IS	IS13					0.025	0.06	230000	5.36173	23000	4.36173	2300	3.36173	0.1	0.01	2	5	6	2300000	230000	23000	0.1	0.01	500000000	8.69897	61000000	7.78533	2300000	6.36173	0.122	0.0046	2.18199	4.28932	6	Medium	Medium	Medium	Low	0.00046	0.000377049	0.001	21	NA
98	26731	0M	IS	IS	IS14					0.025	0.06	23000000	7.36173	230000	5.36173	61000	4.78533	0.01	0.00265217	1	2	6	23000000	6100000	2300000	0.265217	0.1	23000000	7.36173	23000000	7.36173	2300000	6.36173	1	0.1	5	6	6	Medium	Medium	High	Medium	1	0.01	0.0265217	17	NA
99	26737	0M	IS	IS	IS15					0.025	0.06	610000	5.78533	23000	4.36173	230	2.36173	0.0377049	0.000377049	1.40489	2.8646	6	6100000	2300000	61000	0.377049	0.01	6100000	6.78533	2300000	6.36173	230000	5.36173	0.377049	0.0377049	3.72919	6	6	Medium	Low	Medium	Medium	0.1	0.01	0.001	18	NA
100	25793	0M	IS	IS	IS16					0.025	0.06	2300000	6.36173	23000	4.36173	23000	4.36173	0.01	0.01	1	2	6	230000000	230000	2300000	0.001	0.01	230000000	8.36173	23000000	7.36173	2300000	6.36173	0.1	0.01	2	5	6	Medium	Medium	Medium	Medium	0.01	0.001	0.01	15	NA
101	25861	0M	IS	IS	IS17					0.05	0.12	23000000	7.36173	23000	4.36173	23000	4.36173	0.001	0.001	0.666667	1.33333	6	23000000	2300000	6100000	0.1	0.265217	23000000	7.36173	6100000	6.78533	6100000	6.78533	0.265217	0.265217	6	6	6	Low	Medium	Medium	High	1	0.00377049	0.00377049	17	NA
102	25792	0M	IS	IS	IS18					0.05	0.06	2300000	6.36173	230	2.36173	230	2.36173	0.0001	0.0001	0.5	1	2	23000000	23000	23000	0.001	0.001	230000000	8.36173	6100000	6.78533	230000	5.36173	0.0265217	0.001	1.26872	2.89267	6	Low	Low	Low	Low	0.01	3.77049e-05	0.001	15	NA
103	25868	0M	IS	IS	IS19					0.025	0.12	23000	4.36173	2300	3.36173	23	1.36173	0.1	0.001	2	3.5	6	23000	2300	23	0.1	0.001	230000	5.36173	23000	4.36173	23	1.36173	0.1	0.0001	2	3	5	Medium	Medium	Medium	Low	0.1	0.1	1	18	NA
104	25813	0M	IS	IS	IS20					0.025	0.12	230000	5.36173	23000	4.36173	23	1.36173	0.1	0.0001	2	3	5	6100000	2300000	23000	0.377049	0.00377049	6100000	6.78533	6100000	6.78533	610000	5.78533	1	0.1	5	6	6	Medium	Low	High	Medium	0.0377049	0.00377049	3.77049e-05	15	NA
105	25812	0M	IS	IS	IS21					0.05	0.5	610000	5.78533	2300	3.36173	61000	4.78533	0.00377049	0.1	0.825218	1.65044	6	23000000	230000	230000	0.01	0.01	49000000	7.6902	1300000	6.11394	230000	5.36173	0.0265306	0.00469388	1.26883	3.69	6	Low	High	Low	Low	0.012449	0.00176923	0.265217	19	NA
106	25820	0M	IS	IS	IS22					0.025	0.12	230000	5.36173	2300	3.36173	23000	4.36173	0.01	0.1	1	2	6	2300000	61000	230000	0.0265217	0.1	230000000	8.36173	610000	5.78533	610000	5.78533	0.00265217	0.00265217	0.776278	1.55256	6	Medium	High	Low	Low	0.001	0.00377049	0.0377049	19	NA
107	26086	0M	IS	IS	IS23					0.025	0.12	230000	5.36173	23000	4.36173	230	2.36173	0.1	0.001	2	3.5	6	230000	61000	230	0.265217	0.001	2300000	6.36173	2300000	6.36173	61000	4.78533	1	0.01	3.90307	6	6	Medium	Medium	High	Medium	0.1	0.01	0.00377049	15	NA
108	25864	0M	IS	IS	IS24					0.05	0.12	2300000	6.36173	61000	4.78533	61000	4.78533	0.0265217	0.0265217	1.26872	6	6	61000000	230000	610000	0.00377049	0.01	61000000	7.78533	2300000	6.36173	2300000	6.36173	0.0377049	0.0377049	1.40489	6	6	Medium	High	Medium	Medium	0.0377049	0.0265217	0.0265217	19	NA
109	25867	0M	IS	IS	IS25					0.05	0.06	2300000	6.36173	610000	5.78533	61000	4.78533	0.265217	0.0265217	3.27081	6	6	23000000	6100000	610000	0.265217	0.0265217	23000000	7.36173	23000000	7.36173	610000	5.78533	1	0.0265217	3.90307	6	6	High	High	High	Medium	0.1	0.0265217	0.1	15	NA
110	25869	0M	IS	IS	IS26					0.05	0.12	230000	5.36173	23000	4.36173	23000	4.36173	0.1	0.1	2	6	6	23000000	230000	23000	0.01	0.001	23000000	7.36173	13000000	7.11394	2300000	6.36173	0.565217	0.1	5	6	6	Medium	High	High	Medium	0.01	0.00176923	0.01	19	NA
111	25870	0M	IS	IS	IS27					0.025	0.12	610000	5.78533	23000	4.36173	230	2.36173	0.0377049	0.000377049	1.40489	2.8646	6	23000000	230000	230000	0.01	0.01	23000000	7.36173	1300000	6.11394	610000	5.78533	0.0565217	0.0265217	1.60284	6	6	Medium	Low	Medium	Medium	0.0265217	0.0176923	0.000377049	15	NA
112	25871	0M	IS	IS	IS28					0.05	0.12	230000	5.36173	2300	3.36173	230	2.36173	0.01	0.001	1	2	6	610000	23000	610	0.0377049	0.001	23000000	7.36173	610000	5.78533	23000	4.36173	0.0265217	0.001	1.26872	2.89267	6	Medium	Medium	Low	Low	0.01	0.00377049	0.01	15	NA
113	25873	0M	IS	IS	IS29					0.025	0.06	61000	4.78533	23000	4.36173	2300	3.36173	0.377049	0.0377049	3.72919	6	6	230000	23000	2300	0.1	0.01	230000	5.36173	23000	4.36173	6100	3.78533	0.1	0.0265217	2	6	6	High	High	Medium	Medium	0.265217	1	0.377049	29	NA
114	25878	0M	IS	IS	IS30					0.025	0.06	6100000	6.78533	230000	5.36173	6100	3.78533	0.0377049	0.001	1.40489	3.09693	6	61000000	2300000	2300000	0.0377049	0.0377049	61000000	7.78533	6100000	6.78533	2300000	6.36173	0.1	0.0377049	2	6	6	Medium	Medium	Medium	Medium	0.1	0.0377049	0.00265217	15	NA
115	25879	0M	IS	IS	IS31					0.025	0.12	2300000	6.36173	230000	5.36173	2300	3.36173	0.1	0.001	2	3.5	6	61000000	2300000	230000	0.0377049	0.00377049	130000000	8.11394	23000000	7.36173	610000	5.78533	0.176923	0.00469231	2.47155	4.37462	6	Medium	Medium	Medium	Low	0.0176923	0.01	0.00377049	15	NA
116	25880	0M	IS	IS	IS32					0.05	0.12	2300000	6.36173	230000	5.36173	23000	4.36173	0.1	0.01	2	5	6	61000000	23000000	230000	0.377049	0.00377049	61000000	7.78533	23000000	7.36173	6100000	6.78533	0.377049	0.1	5	6	6	Medium	Medium	Medium	Medium	0.0377049	0.01	0.00377049	15	NA
117	25881	0M	IS	IS	IS33					0.025	0.06	2300000	6.36173	23000	4.36173	23000	4.36173	0.01	0.01	1	2	6	61000000	610000	230000	0.01	0.00377049	230000000	8.36173	23000000	7.36173	6100000	6.78533	0.1	0.0265217	2	6	6	Medium	Medium	Medium	Medium	0.01	0.001	0.00377049	19	NA
118	25882	0M	IS	IS	IS34					0.025	0.06	230000	5.36173	23000	4.36173	23	1.36173	0.1	0.0001	2	3	5	230000	61000	23000	0.265217	0.1	23000000	7.36173	6100000	6.78533	610000	5.78533	0.265217	0.0265217	3.27081	6	6	Medium	Low	Medium	Medium	0.01	0.00377049	3.77049e-05	15	NA
119	25883	0M	IS	IS	IS35					0.025	0.06	23000000	7.36173	610000	5.78533	23000	4.36173	0.0265217	0.001	1.26872	2.89267	6	23000000	23000000	2300000	1	0.1	23000000	7.36173	23000000	7.36173	23000000	7.36173	1	1	6	6	6	Medium	Medium	High	High	1	0.0265217	0.001	15	NA
120	25884	0M	IS	IS	IS36					0.025	0.06	6100000	6.78533	610000	5.78533	6100	3.78533	0.1	0.001	2	3.5	6	230000000	2300000	610000	0.01	0.00265217	230000000	8.36173	2300000	6.36173	610000	5.78533	0.01	0.00265217	1	2	6	Medium	Medium	Low	Low	0.0265217	0.265217	0.01	15	NA
121	25886	0M	IS	IS	IS37					0.025	0.06	610000	5.78533	23000	4.36173	23000	4.36173	0.0377049	0.0377049	1.40489	6	6	23000000	230000	610000	0.01	0.0265217	23000000	7.36173	6100000	6.78533	6100000	6.78533	0.265217	0.265217	6	6	6	Medium	High	Medium	High	0.0265217	0.00377049	0.00377049	19	NA
122	25895	0M	IS	IS	IS38					0.025	0.25	2300000	6.36173	61000	4.78533	230	2.36173	0.0265217	0.0001	1.26872	2.52435	5	23000000	230000	61000	0.01	0.00265217	23000000	7.36173	2300000	6.36173	610000	5.78533	0.1	0.0265217	2	6	6	Medium	Low	Medium	Medium	0.1	0.0265217	0.000377049	15	NA
123	25896	0M	IS	IS	IS39					0.05	0.25	2300000	6.36173	23000	4.36173	23000	4.36173	0.01	0.01	1	2	6	61000000	230000	230000	0.00377049	0.00377049	61000000	7.78533	6100000	6.78533	610000	5.78533	0.1	0.01	2	5	6	Medium	Medium	Medium	Medium	0.0377049	0.00377049	0.0377049	15	NA
124	25897	0M	IS	IS	IS40					0.025	0.06	23000000	7.36173	610000	5.78533	23000	4.36173	0.0265217	0.001	1.26872	2.89267	6	23000000	2300000	230000	0.1	0.01	23000000	7.36173	2300000	6.36173	2300000	6.36173	0.1	0.1	2	6	6	Medium	Medium	Medium	Medium	1	0.265217	0.01	15	NA
125	25900	0M	IS	IS	IS41					0.025	0.06	2300000	6.36173	61000	4.78533	230	2.36173	0.0265217	0.0001	1.26872	2.52435	5	2300000	230000	6100	0.1	0.00265217	49000000	7.6902	6100000	6.78533	6100000	6.78533	0.12449	0.12449	6	6	6	Medium	Low	Medium	High	0.0469388	0.01	3.77049e-05	15	NA
126	25901	0M	IS	IS	IS42					0.05	0.06	2300000	6.36173	23000	4.36173	2300	3.36173	0.01	0.001	1	2	6	61000000	230000	23000	0.00377049	0.000377049	61000000	7.78533	6100000	6.78533	610000	5.78533	0.1	0.01	2	5	6	Medium	Medium	Medium	Medium	0.0377049	0.00377049	0.00377049	15	NA
127	25902	0M	IS	IS	IS43					0.05	0.12	2300000	6.36173	230000	5.36173	61000	4.78533	0.1	0.0265217	2	6	6	61000000	6100000	23000000	0.1	0.377049	61000000	7.78533	6100000	6.78533	23000000	7.36173	0.1	0.377049	2	6	6	Medium	High	Medium	High	0.0377049	0.0377049	0.00265217	19	NA
128	25903	0M	IS	IS	IS44					0.05	0.25	6100000	6.78533	61000	4.78533	23	1.36173	0.01	3.77049e-06	1	2	3.75254	23000000	2300000	23000	0.1	0.001	61000000	7.78533	23000000	7.36173	2300000	6.36173	0.377049	0.0377049	3.72919	6	6	Medium	Low	Medium	Medium	0.1	0.00265217	1e-05	15	NA
129	25904	0M	IS	IS	IS45					0.05	0.06	6100000	6.78533	23000	4.36173	6100	3.78533	0.00377049	0.001	0.825218	1.65044	6	23000000	2300000	61000	0.1	0.00265217	23000000	7.36173	6100000	6.78533	2300000	6.36173	0.265217	0.1	5	6	6	Low	Medium	Medium	Medium	0.265217	0.00377049	0.00265217	15	NA
130	25906	0M	IS	IS	IS46					0.05	0.06	6100000	6.78533	23000	4.36173	23000	4.36173	0.00377049	0.00377049	0.825218	1.65044	6	620000000	6100000	2300000	0.00983871	0.00370968	620000000	8.79239	23000000	7.36173	2300000	6.36173	0.0370968	0.00370968	1.39795	3.70801	6	Low	Medium	Low	Low	0.00983871	0.001	0.01	19	NA
131	25908	0M	IS	IS	IS47					0.025	0.06	2300000	6.36173	23000	4.36173	23000	4.36173	0.01	0.01	1	2	6	23000000	230000	2300000	0.01	0.1	23000000	7.36173	6100000	6.78533	2300000	6.36173	0.265217	0.1	5	6	6	Medium	Medium	Medium	Medium	0.1	0.00377049	0.01	19	NA
132	25909	0M	IS	IS	IS48					0.05	0.12	230000	5.36173	6100	3.78533	2300	3.36173	0.0265217	0.01	1.26872	5	6	2300000	23000	23000	0.01	0.01	23000000	7.36173	2300000	6.36173	2300000	6.36173	0.1	0.1	2	6	6	Medium	Medium	Medium	Medium	0.01	0.00265217	0.001	19	NA
133	25910	0M	IS	IS	IS49					0.05	0.06	230000	5.36173	230000	5.36173	23000	4.36173	1	0.1	5	6	6	6100000	610000	230000	0.1	0.0377049	23000000	7.36173	610000	5.78533	610000	5.78533	0.0265217	0.0265217	1.26872	6	6	High	High	Low	Medium	0.01	0.377049	0.0377049	19	NA
134	25911	0M	IS	IS	IS50					0.05	0.06	2300000	6.36173	230000	5.36173	23000	4.36173	0.1	0.01	2	5	6	21000000	6100000	230000	0.290476	0.0109524	21000000	7.32222	6100000	6.78533	610000	5.78533	0.290476	0.0290476	3.38933	6	6	Medium	Medium	Medium	Medium	0.109524	0.0377049	0.0377049	15	NA
135	25913	0M	IS	IS	IS51					0.05	0.25	230000	5.36173	2300	3.36173	23	1.36173	0.01	0.0001	1	2	5	6100000	23000	230	0.00377049	3.77049e-05	23000000	7.36173	2300000	6.36173	130000	5.11394	0.1	0.00565217	2	4.40426	6	Medium	Low	Medium	Low	0.01	0.001	0.000176923	15	NA
136	25914	0M	IS	IS	IS52					0.025	0.12	2300000	6.36173	23000	4.36173	23000	4.36173	0.01	0.01	1	2	6	23000000	610000	23000	0.0265217	0.001	61000000	7.78533	23000000	7.36173	610000	5.78533	0.377049	0.01	3.09693	5	6	Medium	Medium	Medium	Medium	0.0377049	0.001	0.0377049	19	NA
137	25915	0M	IS	IS	IS53					0.05	0.25	2300000	6.36173	230000	5.36173	23	1.36173	0.1	1e-05	2	2.75	4.25	61000000	2300000	23000	0.0377049	0.000377049	61000000	7.78533	2300000	6.36173	230000	5.36173	0.0377049	0.00377049	1.40489	3.72919	6	Medium	Low	Medium	Low	0.0377049	0.1	0.0001	15	NA
138	25917	0M	IS	IS	IS54					0.025	0.06	230000	5.36173	2300	3.36173	23	1.36173	0.01	0.0001	1	2	5	2300000	230000	23	0.1	1e-05	23000000	7.36173	13000000	7.11394	61000	4.78533	0.565217	0.00265217	2.96909	4.25741	6	Medium	Low	High	Low	0.01	0.000176923	0.000377049	15	NA
139	25919	0M	IS	IS	IS55					0.05	0.06	2300000	6.36173	23000	4.36173	2300	3.36173	0.01	0.001	1	2	6	23000000	610000	61000	0.0265217	0.00265217	61000000	7.78533	610000	5.78533	490000	5.6902	0.01	0.00803279	1	2	6	Medium	Medium	Low	Low	0.0377049	0.0377049	0.00469388	19	NA
140	25921	0M	IS	IS	IS56					0.05	0.25	2300000	6.36173	230000	5.36173	61000	4.78533	0.1	0.0265217	2	6	6	23000000	2300000	2300000	0.1	0.1	23000000	7.36173	23000000	7.36173	2300000	6.36173	1	0.1	5	6	6	Medium	High	High	Medium	0.1	0.01	0.0265217	19	NA
141	25922	0M	IS	IS	IS57					0.025	0.06	610000	5.78533	23000	4.36173	2300	3.36173	0.0377049	0.00377049	1.40489	3.72919	6	6100000	610000	61000	0.1	0.01	230000000	8.36173	2300000	6.36173	610000	5.78533	0.01	0.00265217	1	2	6	Medium	Medium	Low	Low	0.00265217	0.01	0.00377049	19	NA
142	25924	0M	IS	IS	IS58					0.025	0.06	2300000	6.36173	23000	4.36173	230	2.36173	0.01	0.0001	1	2	5	61000000	610000	23000	0.01	0.000377049	61000000	7.78533	61000000	7.78533	230000	5.36173	1	0.00377049	3.23783	4.47565	6	Medium	Low	High	Low	0.0377049	0.000377049	0.001	15	NA
143	25926	0M	IS	IS	IS59					0.025	0.06	230000	5.36173	2300	3.36173	230	2.36173	0.01	0.001	1	2	6	610000	23000	23000	0.0377049	0.0377049	6100000	6.78533	6100000	6.78533	230000	5.36173	1	0.0377049	4.10733	6	6	Medium	Medium	High	Medium	0.0377049	0.000377049	0.001	19	NA
144	26061	0M	IS	IS	IS60					0.025	0.06	2300000	6.36173	23000	4.36173	61000	4.78533	0.01	0.0265217	1	2	6	61000000	2300000	610000	0.0377049	0.01	61000000	7.78533	23000000	7.36173	2300000	6.36173	0.377049	0.0377049	3.72919	6	6	Medium	High	Medium	Medium	0.0377049	0.001	0.0265217	19	NA
145	26062	0M	IS	IS	IS61					0.05	0.12	23000000	7.36173	230000	5.36173	230000	5.36173	0.01	0.01	1	2	6	61000000	6100000	230000	0.1	0.00377049	61000000	7.78533	13000000	7.11394	610000	5.78533	0.213115	0.01	2.74201	5	6	Medium	Medium	Medium	Medium	0.377049	0.0176923	0.377049	19	NA
146	26063	0M	IS	IS	IS62					0.05	0.12	6100000	6.78533	230000	5.36173	61000	4.78533	0.0377049	0.01	1.40489	5	6	23000000	6100000	610000	0.265217	0.0265217	23000000	7.36173	6100000	6.78533	2300000	6.36173	0.265217	0.1	5	6	6	Medium	Medium	Medium	Medium	0.265217	0.0377049	0.0265217	15	NA
147	26066	0M	IS	IS	IS63					0.025	0.06	6100000	6.78533	230000	5.36173	61000	4.78533	0.0377049	0.01	1.40489	5	6	23000000	2300000	230000	0.1	0.01	23000000	7.36173	2300000	6.36173	1300000	6.11394	0.1	0.0565217	2	6	6	Medium	Medium	Medium	Medium	0.265217	0.1	0.0469231	15	NA
148	26069	0M	IS	IS	IS64					0.025	0.06	230000	5.36173	23000	4.36173	23	1.36173	0.1	0.0001	2	3	5	6100000	2300000	230000	0.377049	0.0377049	6100000	6.78533	2300000	6.36173	230000	5.36173	0.377049	0.0377049	3.72919	6	6	Medium	Low	Medium	Medium	0.0377049	0.01	0.0001	22	NA
149	26070	0M	IS	IS	IS65					0.025	0.12	2300000	6.36173	61000	4.78533	2300	3.36173	0.0265217	0.001	1.26872	2.89267	6	210000000	2300000	610000	0.0109524	0.00290476	210000000	8.32222	2300000	6.36173	610000	5.78533	0.0109524	0.00290476	1.02015	2.20563	6	Medium	Medium	Low	Low	0.0109524	0.0265217	0.00377049	19	NA
150	26071	0M	IS	IS	IS66					0.025	0.06	2300000	6.36173	23000	4.36173	23000	4.36173	0.01	0.01	1	2	6	23000000	6100000	230000	0.265217	0.01	61000000	7.78533	23000000	7.36173	1300000	6.11394	0.377049	0.0213115	3.38581	6	6	Medium	Medium	Medium	Medium	0.0377049	0.001	0.0176923	19	NA
151	26072	0M	IS	IS	IS67					0.025	0.06	2300000	6.36173	61000	4.78533	61000	4.78533	0.0265217	0.0265217	1.26872	6	6	61000000	2300000	6100000	0.0377049	0.1	61000000	7.78533	6100000	6.78533	6100000	6.78533	0.1	0.1	2	6	6	Medium	High	Medium	Medium	0.0377049	0.01	0.01	19	NA
152	26076	0M	IS	IS	IS68					0.05	0.12	2300000	6.36173	61000	4.78533	6100	3.78533	0.0265217	0.00265217	1.26872	3.27081	6	61000000	2300000	23000	0.0377049	0.000377049	61000000	7.78533	2300000	6.36173	2300000	6.36173	0.0377049	0.0377049	1.40489	6	6	Medium	Medium	Medium	Medium	0.0377049	0.0265217	0.00265217	15	NA
153	26077	0M	IS	IS	IS69					0.025	0.06	230000	5.36173	23000	4.36173	230	2.36173	0.1	0.001	2	3.5	6	2300000	230000	61000	0.1	0.0265217	61000000	7.78533	6100000	6.78533	2300000	6.36173	0.1	0.0377049	2	6	6	Medium	Medium	Medium	Medium	0.00377049	0.00377049	0.0001	15	NA
154	26079	0M	IS	IS	IS70					0.025	0.06	2300000	6.36173	23000	4.36173	23000	4.36173	0.01	0.01	1	2	6	2300000	2300000	230000	1	0.1	23000000	7.36173	6100000	6.78533	610000	5.78533	0.265217	0.0265217	3.27081	6	6	Medium	Medium	Medium	Medium	0.1	0.00377049	0.0377049	15	NA
155	26082	0M	IS	IS	IS71					0.025	0.06	2300000	6.36173	230000	5.36173	23000	4.36173	0.001	0.01	2	5	6	23000000	23000000	230000	1	0.01	23000000	7.36173	23000000	7.36173	6100000	6.78533	1	0.265217	6	6	6	Low	Medium	High	High	0.1	0.01	0.00377049	15	NA
156	26083	0M	IS	IS	IS72					0.025	0.06	2300000	6.36173	2300	3.36173	230	2.36173	0.001	0.0001	0.666667	1.33333	5	23000000	230000	2300	0.01	0.0001	61000000	7.78533	2300000	6.36173	61000	4.78533	0.0377049	0.001	1.40489	3.09693	6	Low	Low	Medium	Low	0.0377049	0.001	0.00377049	19	NA
157	26084	0M	IS	IS	IS73					0.025	0.06	230000	5.36173	23000	4.36173	2300	3.36173	0.1	0.01	2	5	6	2300000	610000	230000	0.265217	0.1	61000000	7.78533	2300000	6.36173	230000	5.36173	0.0377049	0.00377049	1.40489	3.72919	6	Medium	Medium	Medium	Low	0.00377049	0.01	0.01	22	NA
158	26085	0M	IS	IS	IS74					0.025	0.06	2300000	6.36173	61000	4.78533	6100	3.78533	0.0265217	0.00265217	1.26872	3.27081	6	23000000	6100000	230000	0.265217	0.01	23000000	7.36173	6100000	6.78533	610000	5.78533	0.265217	0.0265217	3.27081	6	6	Medium	Medium	Medium	Medium	0.1	0.01	0.01	19	NA
159	26087	0M	IS	IS	IS75					0.025	0.06	61000000	7.78533	230000	5.36173	23000	4.36173	0.00377049	0.000377049	0.825218	1.65044	6	61000000	6100000	230000	0.1	0.00377049	61000000	7.78533	6100000	6.78533	1300000	6.11394	0.1	0.0213115	2	6	6	Low	Low	Medium	Medium	1	0.0377049	0.0176923	15	NA
160	26088	0M	IS	IS	IS76					0.025	0.06	610000	5.78533	2300	3.36173	2300	3.36173	0.00377049	0.00377049	0.825218	1.65044	6	61000000	23000	6100	0.000377049	0.0001	61000000	7.78533	2300000	6.36173	610000	5.78533	0.0377049	0.01	1.40489	5	6	Low	Medium	Medium	Medium	0.01	0.001	0.00377049	19	NA
161	26090	0M	IS	IS	IS77					0.025	0.25	230000	5.36173	61000	4.78533	23	1.36173	0.265217	0.0001	2.37119	3.24746	5	2300000	610000	23000	0.265217	0.01	6100000	6.78533	6100000	6.78533	610000	5.78533	1	0.1	5	6	6	High	Low	High	Medium	0.0377049	0.01	3.77049e-05	15	NA
162	26092	0M	IS	IS	IS78					0.025	0.06	6100000	6.78533	230000	5.36173	23000	4.36173	0.0377049	0.00377049	1.40489	3.72919	6	61000000	610000	610000	0.01	0.01	61000000	7.78533	610000	5.78533	610000	5.78533	0.01	0.01	1	2	6	Medium	Medium	Low	Medium	0.1	0.377049	0.0377049	19	NA
163	26097	0M	IS	IS	IS79					0.05	0.06	610000	5.78533	23000	4.36173	2300	3.36173	0.0377049	0.00377049	1.40489	3.72919	6	2300000	230000	61000	0.1	0.0265217	23000000	7.36173	2300000	6.36173	2300000	6.36173	0.1	0.1	2	6	6	Medium	Medium	Medium	Medium	0.0265217	0.01	0.001	19	NA
164	26100	0M	IS	IS	IS80					0.05	0.12	2300000	6.36173	23000	4.36173	23000	4.36173	0.01	0.01	1	2	6	23000000	2300000	6100000	0.1	0.265217	23000000	7.36173	21000000	7.32222	23000000	7.36173	0.913043	1	6	6	6	Medium	Medium	High	High	0.1	0.00109524	0.001	12	NA
165	26101	0M	IS	IS	IS81					0.05	0.12	610000	5.78533	23000	4.36173	230	2.36173	0.0377049	0.000377049	1.40489	2.8646	6	2300000	61000	6100	0.0265217	0.00265217	21000000	7.32222	2300000	6.36173	610000	5.78533	0.109524	0.0290476	2.20563	6	6	Medium	Low	Medium	Medium	0.0290476	0.01	0.000377049	15	NA
166	26104	0M	IS	IS	IS82					0.025	0.12	4900000	6.6902	23000	4.36173	2300	3.36173	0.00469388	0.000469388	0.858934	1.71787	6	61000000	2300000	230000	0.0377049	0.00377049	61000000	7.78533	13000000	7.11394	1300000	6.11394	0.213115	0.0213115	2.98584	6	6	Low	Low	Medium	Medium	0.0803279	0.00176923	0.00176923	19	NA
167	26106	0M	IS	IS	IS83					0.025	0.12	23000	4.36173	6100	3.78533	23	1.36173	0.265217	0.001	2.52435	3.76217	6	61000	23000	2300	0.377049	0.0377049	6100000	6.78533	2300000	6.36173	23000	4.36173	0.377049	0.00377049	2.8646	4.3646	6	High	Medium	Medium	Low	0.00377049	0.00265217	0.001	15	NA
168	26107	0M	IS	IS	IS84					0.05	0.25	2300000	6.36173	230000	5.36173	23000	4.36173	0.1	0.01	2	5	6	23000000	2300000	610000	0.1	0.0265217	23000000	7.36173	2300000	6.36173	610000	5.78533	0.1	0.0265217	2	6	6	Medium	Medium	Medium	Medium	0.1	0.1	0.0377049	15	NA
169	26109	0M	IS	IS	IS85					0.025	0.06	2300000	6.36173	23000	4.36173	2300	3.36173	0.01	0.001	1	2	6	23000000	230000	61000	0.01	0.00265217	61000000	7.78533	2300000	6.36173	610000	5.78533	0.0377049	0.01	1.40489	5	6	Medium	Medium	Medium	Medium	0.0377049	0.01	0.00377049	19	NA
170	26110	0M	IS	IS	IS86					0.05	0.12	2300000	6.36173	230000	5.36173	23000	4.36173	0.1	0.01	2	5	6	230000000	6100000	2300000	0.0265217	0.01	230000000	8.36173	6100000	6.78533	2300000	6.36173	0.0265217	0.01	1.26872	5	6	Medium	Medium	Low	Medium	0.01	0.0377049	0.01	12	NA
171	26111	0M	IS	IS	IS87					0.025	0.12	2300000	6.36173	230000	5.36173	230	2.36173	0.1	0.0001	2	3	5	23000000	23000000	610000	1	0.0265217	23000000	7.36173	23000000	7.36173	2300000	6.36173	1	0.1	5	6	6	Medium	Low	High	Medium	0.1	0.01	0.0001	15	NA
172	26113	0M	IS	IS	IS88					0.025	0.06	2300000	6.36173	23000	4.36173	23000	4.36173	0.01	0.01	1	2	6	23000000	230000	230000	0.01	0.01	23000000	7.36173	2300000	6.36173	610000	5.78533	0.1	0.0265217	2	6	6	Medium	Medium	Medium	Medium	0.1	0.01	0.0377049	19	NA
173	26114	0M	IS	IS	IS89					0.05	0.06	2300000	6.36173	23000	4.36173	23000	4.36173	0.01	0.01	1	2	6	230000000	230000	230000	0.001	0.001	230000000	8.36173	6100000	6.78533	2300000	6.36173	0.0265217	0.01	1.26872	5	6	Medium	Medium	Low	Medium	0.01	0.00377049	0.01	19	NA
174	26115	0M	IS	IS	IS90					0.025	0.06	23000000	7.36173	230000	5.36173	23000	4.36173	0.01	0.001	1	2	6	61000000	6100000	610000	0.1	0.01	61000000	7.78533	6100000	6.78533	2300000	6.36173	0.1	0.0377049	2	6	6	Medium	Medium	Medium	Medium	0.377049	0.0377049	0.01	15	NA
175	26116	0M	IS	IS	IS91					0.025	0.25	2300000	6.36173	23000	4.36173	2300	3.36173	0.01	0.001	1	2	6	61000000	2300000	230000	0.0377049	0.00377049	61000000	7.78533	23000000	7.36173	610000	5.78533	0.377049	0.01	3.09693	5	6	Medium	Medium	Medium	Medium	0.0377049	0.001	0.00377049	15	NA
176	26191	0M	IS	IS	IS92					0.05	0.25	61000	4.78533	2300	3.36173	230	2.36173	0.0377049	0.00377049	1.40489	3.72919	6	61000	2300	230	0.0377049	0.00377049	61000	4.78533	2300	3.36173	230	2.36173	0.0377049	0.00377049	1.40489	3.72919	6	Medium	Medium	Medium	Low	1	1	1	37	NA
177	26194	0M	IS	IS	IS93					0.05	0.12	61000000	7.78533	490000	5.6902	23000	4.36173	0.00803279	0.000377049	0.954593	1.90919	6	130000000	6100000	610000	0.0469231	0.00469231	130000000	8.11394	23000000	7.36173	2300000	6.36173	0.176923	0.0176923	2.74335	6	6	Low	Low	Medium	Medium	0.469231	0.0213043	0.01	15	NA
178	26197	0M	IS	IS	IS94					0.025	0.12	2300000	6.36173	23000	4.36173	23000	4.36173	0.01	0.01	1	2	6	230000000	610000	6100000	0.00265217	0.0265217	230000000	8.36173	23000000	7.36173	6100000	6.78533	0.1	0.0265217	2	6	6	Medium	Medium	Medium	Medium	0.01	0.001	0.00377049	19	NA
179	26198	0M	IS	IS	IS95					0.05	0.12	6100000	6.78533	610000	5.78533	230	2.36173	0.1	3.77049e-05	2	2.87627	4.62881	23000000	6100000	230	0.265217	1e-05	23000000	7.36173	6100000	6.78533	230	2.36173	0.265217	1e-05	2.28728	2.96546	4.32182	Medium	Low	Medium	Low	0.265217	0.1	1	13	NA
180	26199	0M	IS	IS	IS96					0.05	0.06	2300000	6.36173	23000	4.36173	230	2.36173	0.01	0.0001	1	2	5	23000000	230000	230	0.01	1e-05	23000000	7.36173	6100000	6.78533	230	2.36173	0.265217	1e-05	2.28728	2.96546	4.32182	Medium	Low	Medium	Low	0.1	0.00377049	1	13	NA
181	26200	0M	IS	IS	IS97					0.05	0.06	2300000	6.36173	230000	5.36173	23000	4.36173	0.1	0.01	2	5	6	23000000	610000	610000	0.0265217	0.0265217	23000000	7.36173	6100000	6.78533	610000	5.78533	0.265217	0.0265217	3.27081	6	6	Medium	Medium	Medium	Medium	0.1	0.0377049	0.0377049	19	NA
182	26201	0M	IS	IS	IS98					0.05	0.25	23000000	7.36173	230000	5.36173	230	2.36173	0.01	1e-05	1	2	4	23000000	610000	230	0.0265217	1e-05	23000000	7.36173	2300000	6.36173	230	2.36173	0.1	1e-05	2	2.75	4.25	Medium	Low	Medium	Low	1	0.1	1	13	NA
183	26202	0M	IS	IS	IS99					0.025	0.12	230000	5.36173	2300	3.36173	2300	3.36173	0.01	0.01	1	2	6	230000	2300	6100	0.01	0.0265217	230000	5.36173	2300	3.36173	6100	3.78533	0.01	0.0265217	1	2	6	Medium	Medium	Low	Medium	1	1	0.377049	23	NA
184	26255	0M	IS	IS	IS100					0.05	0.12	2300000	6.36173	490000	5.6902	23000	4.36173	0.213043	0.01	2.74176	5	6	23000000	6100000	230000	0.265217	0.01	23000000	7.36173	23000000	7.36173	610000	5.78533	1	0.0265217	3.90307	6	6	High	Medium	High	Medium	0.1	0.0213043	0.0377049	15	NA
185	26266	0M	IS	IS	IS101					0.025	0.06	6100000	6.78533	23000	4.36173	23000	4.36173	0.00377049	0.00377049	0.825218	1.65044	6	61000000	23000000	2300000	0.377049	0.0377049	61000000	7.78533	61000000	7.78533	6100000	6.78533	1	0.1	5	6	6	Low	Medium	High	Medium	0.1	0.000377049	0.00377049	13	NA
186	26267	0M	IS	IS	IS102					0.025	0.12	6100000	6.78533	230000	5.36173	23	1.36173	0.0377049	3.77049e-06	1.40489	2.4323	3.9323	230000000	23000000	2300	0.1	1e-05	230000000	8.36173	23000000	7.36173	2300	3.36173	0.1	1e-05	2	2.75	4.25	Medium	Low	Medium	Low	0.0265217	0.01	0.01	13	NA
187	26269	0M	IS	IS	IS103					0.05	0.06	6100000	6.78533	23000	4.36173	230000	5.36173	0.00377049	0.0377049	0.825218	1.65044	6	61000000	610000	2300000	0.01	0.0377049	230000000	8.36173	2300000	6.36173	2300000	6.36173	0.01	0.01	1	2	6	Low	High	Low	Medium	0.0265217	0.01	0.1	19	NA
188	26280	0M	IS	IS	IS104					0.025	0.06	61000	4.78533	6100	3.78533	230	2.36173	0.1	0.00377049	2	4.10733	6	61000	6100	230	0.1	0.00377049	61000	4.78533	6100	3.78533	230	2.36173	0.1	0.00377049	2	4.10733	6	Medium	Medium	Medium	Low	1	1	1	29	NA
189	26295	0M	IS	IS	IS105					0.025	0.06	2300000	6.36173	61000	4.78533	61000	4.78533	0.0265217	0.0265217	1.26872	6	6	23000000	2300000	2300000	0.1	0.1	23000000	7.36173	13000000	7.11394	2300000	6.36173	0.565217	0.1	5	6	6	Medium	High	High	Medium	0.1	0.00469231	0.0265217	19	NA
190	26318	0M	IS	IS	IS106					0.025	0.06	230000	5.36173	23000	4.36173	2300	3.36173	0.1	0.01	2	5	6	230000	23000	23000	0.1	0.1	230000	5.36173	23000	4.36173	61000	4.78533	0.1	0.265217	2	6	6	Medium	Medium	Medium	High	1	1	0.0377049	29	NA
191	26321	0M	IS	IS	IS107					0.025	0.06	23000	4.36173	23000	4.36173	6100	3.78533	1	0.265217	6	6	6	61000	23000	23000	0.377049	0.377049	61000	4.78533	23000	4.36173	230000	5.36173	0.377049	3.77049	6	6	6	High	High	Medium	High	0.377049	1	0.0265217	30	NA
192	26329	0M	IS	IS	IS108					0.025	0.06	2300000	6.36173	2300	3.36173	23000	4.36173	0.001	0.01	0.666667	1.33333	6	230000000	230000	2300000	0.001	0.01	230000000	8.36173	6100000	6.78533	2300000	6.36173	0.0265217	0.01	1.26872	5	6	Low	Medium	Low	Medium	0.01	0.000377049	0.01	19	NA
193	26336	0M	IS	IS	IS109					0.025	0.06	6100000	6.78533	23000	4.36173	23000	4.36173	0.00377049	0.00377049	0.825218	1.65044	6	23000000	230000	6100000	0.01	0.265217	61000000	7.78533	23000000	7.36173	23000000	7.36173	0.377049	0.377049	6	6	6	Low	Medium	Medium	High	0.1	0.001	0.001	19	NA
194	26439	0M	IS	IS	IS110					0.025	0.06	2300000	6.36173	23000	4.36173	230000	5.36173	0.01	0.1	1	2	6	61000000	6100000	2300000	0.1	0.0377049	61000000	7.78533	6100000	6.78533	2300000	6.36173	0.1	0.0377049	2	6	6	Medium	High	Medium	Medium	0.0377049	0.00377049	0.1	19	NA
195	26443	0M	IS	IS	IS111					0.05	0.06	2300000	6.36173	23000	4.36173	23000	4.36173	0.01	0.01	1	2	6	23000000	2300000	6100000	0.1	0.265217	61000000	7.78533	2300000	6.36173	6100000	6.78533	0.0377049	0.1	1.40489	6	6	Medium	Medium	Medium	Medium	0.0377049	0.01	0.00377049	19	NA
196	26448	0M	IS	IS	IS112					0.05	0.06	230000	5.36173	23000	4.36173	230	2.36173	0.1	0.001	2	3.5	6	61000000	610000	230000	0.01	0.00377049	61000000	7.78533	6100000	6.78533	2300000	6.36173	0.1	0.0377049	2	6	6	Medium	Medium	Medium	Medium	0.00377049	0.00377049	0.0001	15	NA
197	26458	0M	IS	IS	IS113					0.025	0.06	610000	5.78533	61000	4.78533	2300	3.36173	0.1	0.00377049	2	4.10733	6	23000000	2300000	610000	0.1	0.0265217	23000000	7.36173	6100000	6.78533	2300000	6.36173	0.265217	0.1	5	6	6	Medium	Medium	Medium	Medium	0.0265217	0.01	0.001	8	NA
198	26483	0M	IS	IS	IS114					0.025	0.06	2300000	6.36173	23000	4.36173	2300	3.36173	0.01	0.001	1	2	6	61000000	2300000	230000	0.0377049	0.00377049	61000000	7.78533	2300000	6.36173	2300000	6.36173	0.0377049	0.0377049	1.40489	6	6	Medium	Medium	Medium	Medium	0.0377049	0.01	0.001	8	NA
199	26514	0M	IS	IS	IS115					0.05	0.06	610000	5.78533	23000	4.36173	2300	3.36173	0.0377049	0.00377049	1.40489	3.72919	6	6100000	230000	49000	0.0377049	0.00803279	13000000	7.11394	4900000	6.6902	2300000	6.36173	0.376923	0.176923	6	6	6	Medium	Medium	Medium	High	0.0469231	0.00469388	0.001	15	ahpC_G-48A
200	26521	0M	IS	IS	IS116					0.025	0.06	230000	5.36173	23000	4.36173	23000	4.36173	0.1	0.1	2	6	6	23000000	610000	230000	0.0265217	0.01	23000000	7.36173	23000000	7.36173	23000000	7.36173	1	1	6	6	6	Medium	High	High	High	0.01	0.001	0.001	19	NA
201	26530	0M	IS	IS	IS117					0.025	0.06	2300000	6.36173	23000	4.36173	610	2.78533	0.01	0.000265217	1	2	6	61000000	6100000	230000	0.1	0.00377049	61000000	7.78533	6100000	6.78533	6100000	6.78533	0.1	0.1	2	6	6	Medium	Low	Medium	Medium	0.0377049	0.00377049	0.0001	15	NA
202	26542	0M	IS	IS	IS118					0.025	0.06	610000	5.78533	2300	3.36173	230	2.36173	0.00377049	0.000377049	0.825218	1.65044	6	23000000	610000	230000	0.0265217	0.01	23000000	7.36173	2300000	6.36173	2300000	6.36173	0.1	0.1	2	6	6	Low	Low	Medium	Medium	0.0265217	0.001	0.0001	15	NA
203	26560	0M	IS	IS	IS119					0.025	0.06	23000	4.36173	2300	3.36173	2300	3.36173	0.1	0.1	2	6	6	2300000	230000	230000	0.1	0.1	49000000	7.6902	23000000	7.36173	23000000	7.36173	0.469388	0.469388	6	6	6	Medium	High	High	High	0.000469388	0.0001	0.0001	19	NA
204	25179	24M	MDR		MDR1	R	R	R	R			230000	5.36173	230000	5.36173	230000	5.36173	1	1	6	6	6	23000000	2300000	61000000	0.1	2.65217	61000000	7.78533	230000000	8.36173	61000000	7.78533	3.77049	1	6	6	6	MDR	MDR	MDR	MDR	0.00377049	0.001	0.00377049	19	katG_S315X
205	20525	0M	MDR		MDR2	R	R	R	R			610000	5.78533	610000	5.78533	230000	5.36173	1	0.377049	6	6	6	23000000	23000000	23000000	1	1	61000000	7.78533	23000000	7.36173	61000000	7.78533	0.377049	1	6	6	6	MDR	MDR	MDR	MDR	0.01	0.0265217	0.00377049	15	katG_S315X
206	21555	1M	MDR		MDR3	R	R	R	R			230000	5.36173	610000	5.78533	2300000	6.36173	2.65217	10	6	6	6	23000000	23000000	61000000	1	2.65217	230000000	8.36173	23000000	7.36173	61000000	7.78533	0.1	0.265217	2	6	6	MDR	MDR	MDR	MDR	0.001	0.0265217	0.0377049	19	katG_S315X
207	23172	5M	MDR		MDR4	R	R	R	R			230000	5.36173	230000	5.36173	2300000	6.36173	1	10	6	6	6	61000000	23000000	61000000	0.377049	1	230000000	8.36173	230000000	8.36173	61000000	7.78533	1	0.265217	6	6	6	MDR	MDR	MDR	MDR	0.001	0.001	0.0377049	19	katG_S315X
208	21925	0M	MDR		MDR5	R	R	R	R			610000	5.78533	230000	5.36173	2300000	6.36173	0.377049	3.77049	6	6	6	23000000	23000000	23000000	1	1	61000000	7.78533	61000000	7.78533	23000000	7.36173	1	0.377049	6	6	6	MDR	MDR	MDR	MDR	0.01	0.00377049	0.1	19	katG_S315X
209	17106	2M	MDR		MDR6	R	R	R	R			4900000	6.6902	23000	4.36173	23000	4.36173	0.00469388	0.00469388	0.858934	1.71787	6	230000000	610000	2300000	0.00265217	0.01	230000000	8.36173	6100000	6.78533	2300000	6.36173	0.0265217	0.01	1.26872	5	6	MDR	MDR	MDR	MDR	0.0213043	0.00377049	0.01	19	katG_S315X
210	20955	0M	MDR-G		MDR-G1	S	R	R	R	3.2	0.12	230000	5.36173	23000	4.36173	23000	4.36173	0.1	0.1	2	6	6	6100000	610000	230000	0.1	0.0377049	23000000	7.36173	23000000	7.36173	6100000	6.78533	1	0.265217	6	6	6	MDR	MDR	MDR	MDR	0.01	0.001	0.00377049	14	katG_S315X
211	17704	0M	MDR-G		MDR-G2	S	R	R	R	1.6	0.12	230000	5.36173	23000	4.36173	23000	4.36173	0.1	0.1	2	6	6	23000000	23000000	2300000	1	0.1	NA	#VALUE!	NA	#VALUE!	NA	#VALUE!			#VALUE!	#VALUE!	#VALUE!	MDR	MDR	MDR	MDR				39	katG_S315X
212	22328	0M	MDR-G		MDR-G3	S	R	R	R	3.2	0.5	23000	4.36173	23000	4.36173	23000	4.36173	1	1	6	6	6	2300000	230000	230000	0.1	0.1	23000000	7.36173	13000000	7.11394	23000000	7.36173	0.565217	1	6	6	6	MDR	MDR	MDR	MDR	0.001	0.00176923	0.001	20	katG_S315X
213	18031	5M	MDR-G		MDR-G4	S	R	R	R	3.2	0.5	230000	5.36173	23000	4.36173	23000	4.36173	0.1	0.1	2	6	6	6100000	230000	230000	0.0377049	0.0377049	23000000	7.36173	2300000	6.36173	6100000	6.78533	0.1	0.265217	2	6	6	MDR	MDR	MDR	MDR	0.01	0.01	0.00377049	15	katG_S315X
214	20932	18M	MDR-G		MDR-G5	S	R	R	R	3.2	0.5	610000	5.78533	23000	4.36173	23000	4.36173	0.0377049	0.0377049	1.40489	6	6	61000000	230000	230000	0.00377049	0.00377049	61000000	7.78533	23000000	7.36173	6100000	6.78533	0.377049	0.1	5	6	6	MDR	MDR	MDR	MDR	0.01	0.001	0.00377049	15	katG_S315X
215	21785	24M	MDR-G		MDR-G6	S	R	R	R	3.2	0.12	2300000	6.36173	610000	5.78533	23000	4.36173	0.265217	0.01	2.89267	5	6	230000000	2300000	2300000	0.01	0.01	230000000	8.36173	23000000	7.36173	6100000	6.78533	0.1	0.0265217	2	6	6	MDR	MDR	MDR	MDR	0.01	0.0265217	0.00377049	15	katG_S315X
216	21702	2M	MDR-G		MDR-G7	S	R	R	R	6.4	0.5	23000	4.36173	23000	4.36173	23000	4.36173	1	1	6	6	6	2300000	2300000	610000	1	0.265217	23000000	7.36173	61000000	7.78533	6100000	6.78533	2.65217	0.265217	6	6	6	MDR	MDR	MDR	MDR	0.001	0.000377049	0.00377049	19	katG_S315X
217	21163	0M	MDR-G		MDR-G8	S	R	R	R	NA	NA	230000	5.36173	23000	4.36173	230000	5.36173	0.1	1	2	6	6	23000000	2300000	2300000	0.1	0.1	23000000	7.36173	6100000	6.78533	6100000	6.78533	0.265217	0.265217	6	6	6	MDR	MDR	MDR	MDR	0.01	0.00377049	0.0377049	19	katG_S315X
