# Supplementary material for: Rifampicin tolerance and growth fitness among isoniazid-resistant clinical Mycobacterium tuberculosis isolates from a longitudinal study
Source: eLife. 2024 Sep 9;13:RP93243. doi: 10.7554/eLife.93243 (PMC11383526; doi:10.7554/eLife.93243)
Supplement: Supplementary file 3. [file elife-93243-supp3.xlsx]

## Sheet: Raw
		code	timepoint	archive	oucru_robot	Study	public_code	sample	new_public_code
		02TB0158	0M	17027	9688-SRR5074128	{02TB_HoltEtAl,sequential}	PRJNA355614	IR1	PRJEB78540
		02TB0206	0M	17112	9642-SRR5073782	{02TB_HoltEtAl,sequential}	PRJNA355614	IR2	PRJEB78540
		02TB0334	0M	17436	3742-02MTB0334	{02TB_HoltEtAl,sequential}	PRJNA355614	IR3	PRJEB78540
		02TB0449	0M	17705	3838-02MTB0449	{02TB_HoltEtAl,sequential}	PRJNA355614	IR4	PRJEB78540
		02TB0552	0M	18124	3924-02MTB0552	{02TB_HoltEtAl,sequential}	PRJNA355614	IR5	PRJEB78540
		02TB0847	0M	18499	4171-02MTB0847	{02TB_HoltEtAl,sequential}	PRJNA355614	IR6	PRJEB78540
		02TB0959	0M	19394	4275-02MTB0959	{02TB_HoltEtAl,sequential}	PRJNA355614	IR7	PRJEB78540
		02TB1565	0M	20948	9057-SRR5065269	{02TB_HoltEtAl,sequential}	PRJNA355614	IR10	PRJEB78540
		02TB1567	0M	20951	9368-SRR5065665	{02TB_HoltEtAl,sequential}	PRJNA355614	IR11	PRJEB78540
		02TB1596	0M	20877	9269-SRR5065542	{02TB_HoltEtAl,sequential}	PRJNA355614	IR12	PRJEB78540
		02TB1618	0M	20874	9747-SRR5065400	{02TB_HoltEtAl,sequential}	PRJNA355614	IR13	PRJEB78540
		02TB1642	0M	20944	9143-SRR5065376	{02TB_HoltEtAl,sequential}	PRJNA355614	IR14	PRJEB78540
		02TB1811	0M	21096	9310-SRR5065593	{02TB_HoltEtAl,sequential}	PRJNA355614	IR15	PRJEB78540
		02TB1813	0M	21098	9049-SRR5065260	{02TB_HoltEtAl,sequential}	PRJNA355614	IR16	PRJEB78540
		02TB1826	0M	21465	9353-SRR5065645	{02TB_HoltEtAl,sequential}	PRJNA355614	IR17	PRJEB78540
		02TB1827	0M	21466	9300-SRR5065581	{02TB_HoltEtAl,sequential}	PRJNA355614	IR18	PRJEB78540
		02TB1955	0M	22325	9324-SRR5065611	{02TB_HoltEtAl,sequential}	PRJNA355614	IR19	PRJEB78540
		02TB1958	0M	22331	9222-SRR5065482	{02TB_HoltEtAl,sequential}	PRJNA355614	IR20	PRJEB78540
		02TB1989	0M	22511	9093-SRR5065313	{02TB_HoltEtAl,sequential}	PRJNA355614	IR21	PRJEB78540
		02TB0231	0M	17034	9655-SRR5073892	{02TB_HoltEtAl,sequential}	PRJNA355614	IR23	PRJEB78540
		02TB0294	0M	17702	3712-02MTB0294	{02TB_HoltEtAl,sequential}	PRJNA355614	IR24	PRJEB78540
		02TB0475	0M	17700	3859-02MTB0475	{02TB_HoltEtAl,sequential}	PRJNA355614	IR25	PRJEB78540
		02TB0564	0M	18388	3937-02MTB0564	{02TB_HoltEtAl,sequential}	PRJNA355614	IR26	PRJEB78540
		02TB0695	0M	18228	4049-02MTB0695	{02TB_HoltEtAl,sequential}	PRJNA355614	IR27	PRJEB78540
		02TB0896	0M	19536	9820-SRR5067328	{02TB_HoltEtAl,sequential}	PRJNA355614	IR28	PRJEB78540
		02TB1051	0M	19831	9808-SRR5067240	{02TB_HoltEtAl,sequential}	PRJNA355614	IR29	PRJEB78540
		02TB1095	0M	21043	9805-SRR5067221	{02TB_HoltEtAl,sequential}	PRJNA355614	IR30	PRJEB78540
		02TB1166	0M	19894	9816-SRR5067300	{02TB_HoltEtAl,sequential}	PRJNA355614	IR31	PRJEB78540
		02TB1228	0M	19829	9581-SRR5067623	{02TB_HoltEtAl,sequential}	PRJNA355614	IR32	PRJEB78540
		02TB1266	0M	19533	9442-SRR5067303	{02TB_HoltEtAl,sequential}	PRJNA355614	IR33	PRJEB78540
		02TB1486	0M	20517	9548-SRR5067549	{02TB_HoltEtAl,sequential}	PRJNA355614	IR34	PRJEB78540
		02TB1648	0M	20947	9159-SRR5065410	{02TB_HoltEtAl,sequential}	PRJNA355614	IR36	PRJEB78540
		02TB1940	0M	21698	9735-SRR5065361	{02TB_HoltEtAl,sequential}	PRJNA355614	IR37	PRJEB78540
		02TB2016	0M	21696	9004-SRR5065206	{02TB_HoltEtAl,sequential}	PRJNA355614	IR38	PRJEB78540
		02TB2100	0M	22515	9346-SRR5065637	{02TB_HoltEtAl,sequential}	PRJNA355614	IR39	PRJEB78540
		02TB1949	5M	22656	10324-22656_S13	{02TBsequential}	no	IR40	PRJEB78540
		02TB1949	8M	23445	10338-23445_S34	{02TBsequential}	no	IR41	PRJEB78540
		02TB1949	0M	21927	No WGS	No WGS		#N/A
		02TB0294	1M	17532	10040-17532_S17	{02TBsequential}	no	IR44	PRJEB78540
		02TB0476	8M	18809	10125-18809_S10	{02TBsequential}	no	IR46	PRJEB78540
		02TB0564	12M	20645	10211-20645_S16	{02TBsequential}	no	IR47	PRJEB78540
		02TB0896	1M	19235	10140-19235_S13	{02TBsequential}	no	IR48	PRJEB78540
		02TB1095	1M	20324	10201-20324_S13	{02TBsequential}	no	IR51	PRJEB78540
		02TB1095	2M	20651	10216-20651_S4	{02TBsequential}	no	IR52	PRJEB78540
		02TB1095	12M	22196	10323-22196_S26	{02TBsequential}	no	IR53	PRJEB78540
		02TB1228	8M	20926	10242-20926_S5	{02TBsequential}	no	IR54	PRJEB78540
		02TB1266	5M	19777	10168-19777_S17	{02TBsequential}	no	IR55	PRJEB78540
		02TB1486	24M	24897	10352-24897_S8	{02TBsequential}	no	IR56	PRJEB78540
		02TB1636	1M	20644	10210-20644_S15	{02TBsequential}	no	IR57	PRJEB78540
		02TB1636	18M	22966	10329-22966_S30	{02TBsequential}	no	IR58	PRJEB78540
		02TB1648	2M	20771	10229-20771_S12	{02TBsequential}	no	IR59	PRJEB78540
		02TB1648	12M	22657	10325-22657_S27	{02TBsequential}	no	IR60	PRJEB78540
		02TB1940	12M	23836	10343-23836_S2	{02TBsequential}	no	IR61	PRJEB78540
		02TB1940	18M	25180	10354-25180_S19	{02TBsequential}	no	IR62	PRJEB78540
		02TB2016	1M	21397	10286-21397_S14	{02TBsequential}	no	IR63	PRJEB78540
		02TB2016	12M	24551	10350-24551_S18	{02TBsequential}	no	IR64	PRJEB78540
		02TB2100	1M	22191	10318-22191_S11	{02TBsequential}	no	IR65	PRJEB78540
		02TB0557	1M	18029	10076-18029_S21	{02TBsequential}	no	IR67	PRJEB78540
		02TB0781	2M	18333	10082-18333_S23	{02TBsequential}	no	IR68	PRJEB78540
		02TB0912	0M	19399	4233-02MTB0912	{02TB_HoltEtAl,sequential}	PRJNA355614	IR69	PRJEB78540
		02TB1052	0M	19893	No WGS	No WGS		IR70
		02TB1243	1M	19773	10158-19773_S17	{02TBsequential}	no	IR71	PRJEB78540
		02TB1704	0M	21171	9263-SRR5065534	{02TB_HoltEtAl,sequential}	PRJNA355614	IR72	PRJEB78540
		02TB1913	0M	21174	9006-SRR5065209	{02TB_HoltEtAl,sequential}	PRJNA355614	IR73	PRJEB78540
		02TB1925	0M	21756	9074-SRR5065292	{02TB_HoltEtAl,sequential}	PRJNA355614	IR74	PRJEB78540
		02TB0380	1M	17342	10020-17342_S16	{02TBsequential}	no	IR75	PRJEB78540
		02TB0742	0M	18341	No WGS	No WGS		IR77
		02TB1062	0M	19913	9858-SRR5067611	{02TB_HoltEtAl,sequential}	PRJNA355614	IR78	PRJEB78540
		02TB1492	1M	20000	10179-20000_S7	{02TBsequential}	no	IR79	PRJEB78540
		02TB1492	8M	21233	10270-21233_S14	{02TBsequential}	no	IR80	PRJEB78540
		02TB1566	1M	20646	10213-20646_S1	{02TBsequential}	no	IR81	PRJEB78540
		02TB1566	0M	20950	9162-SRR5065414	{02TB_HoltEtAl,sequential}	PRJNA355614	IR82	PRJEB78540
		02TB1909	12M	23837	10344-23837_S3	{02TBsequential}	no	IR83	PRJEB78540
		02TB1909	0M	21349	9750-SRR5065406	{02TB_HoltEtAl,sequential}	PRJNA355614	IR84	PRJEB78540
		02TB2208	0M	25912	5189-25912	{02TB_extension}	not yet	IS2
		02TB2210	0M	26189	5259-26189	{02TB_extension}	not yet	IS3
		02TB2214	0M	26204	5645-26204-2	{02TB_extension}	not yet	IS5
		02TB2225	0M	26652	5001-WMB865	{02TB_extension}	not yet	IS6
		02TB2229	0M	26705	5009-WMB874	{02TB_extension}	not yet	IS7
		02TB2232	0M	26550	4955-WMB814	{02TB_extension}	not yet	IS8
		02TB2234	0M	26600	4980-WMB842	{02TB_extension}	not yet	IS9
		02TB2236	0M	26611	4990-WMB853	{02TB_extension}	not yet	IS10
		02TB2237	0M	26716	5017-WMB885	{02TB_extension}	not yet	IS11
		02TB2238	0M	26722	5023-WMB891	{02TB_extension}	not yet	IS12
		02TB2239	0M	26622	5000-WMB864	{02TB_extension}	not yet	IS13
		02TB2240	0M	26731	5030-WMB899	{02TB_extension}	not yet	IS14
		02TB2241	0M	26737	5036-WMB905	{02TB_extension}	not yet	IS15
		02TB2262	0M	25793	5119-25793	{02TB_extension}	not yet	IS16
		02TB2263	0M	25861	5142-25861	{02TB_extension}	not yet	IS17
		02TB2264	0M	25792	5118-25792	{02TB_extension}	not yet	IS18
		02TB2266	0M	25813	5345-25813-2	{02TB_extension}	not yet	IS20
		02TB2268	0M	25812	5135-25812	{02TB_extension}	not yet	IS21
		02TB2269	0M	25820	5140-25820	{02TB_extension}	not yet	IS22
		02TB2276	0M	26086	5226-26086	{02TB_extension}	not yet	IS23
		02TB2448	0M	25864	5145-25864	{02TB_extension}	not yet	IS24
		02TB2389	0M	25867	5148-25867	{02TB_extension}	not yet	IS25
		02TB2451	0M	25869	5380-25869-1	{02TB_extension}	not yet	IS26
		02TB2452	0M	25870	5151-25870	{02TB_extension}	not yet	IS27
		02TB2398	0M	25871	5152-25871	{02TB_extension}	not yet	IS28
		02TB2578	0M	25873	5154-25873	{02TB_extension}	not yet	IS29
		02TB2564	0M	25878	5158-25878	{02TB_extension}	not yet	IS30
		02TB2505	0M	25879	5159-25879	{02TB_extension}	not yet	IS31
		02TB2504	0M	25880	5160-25880	{02TB_extension}	not yet	IS32
		02TB2503	0M	25881	5161-25881	{02TB_extension}	not yet	IS33
		02TB2392	0M	25882	5162-25882	{02TB_extension}	not yet	IS34
		02TB2393	0M	25883	5163-25883	{02TB_extension}	not yet	IS35
		02TB2394	0M	25884	5164-25884	{02TB_extension}	not yet	IS36
		02TB2565	0M	25886	5166-25886	{02TB_extension}	not yet	IS37
		02TB2391	0M	25895	5173-25895	{02TB_extension}	not yet	IS38
		02TB2455	0M	25896	5174-25896	{02TB_extension}	not yet	IS39
		02TB2567	0M	25897	5175-25897	{02TB_extension}	not yet	IS40
		02TB2507	0M	25900	5178-25900	{02TB_extension}	not yet	IS41
		02TB2506	0M	25901	5179-25901	{02TB_extension}	not yet	IS42
		02TB2569	0M	25902	5180-25902	{02TB_extension}	not yet	IS43
		02TB2458	0M	25903	5181-25903	{02TB_extension}	not yet	IS44
		02TB2457	0M	25904	5182-25904	{02TB_extension}	not yet	IS45
		02TB2330	0M	25906	5183-25906	{02TB_extension}	not yet	IS46
		02TB2592	0M	25908	5185-25908	{02TB_extension}	not yet	IS47
		02TB2570	0M	25909	5186-25909	{02TB_extension}	not yet	IS48
		02TB2510	0M	25910	5187-25910	{02TB_extension}	not yet	IS49
		02TB2405	0M	25911	5188-25911	{02TB_extension}	not yet	IS50
		02TB2595	0M	25913	5190-25913	{02TB_extension}	not yet	IS51
		02TB2596	0M	25914	5191-25914	{02TB_extension}	not yet	IS52
		02TB2459	0M	25915	5192-25915	{02TB_extension}	not yet	IS53
		02TB2461	0M	25917	5194-25917	{02TB_extension}	not yet	IS54
		02TB2331	0M	25919	5196-25919	{02TB_extension}	not yet	IS55
		02TB2583	0M	25921	5198-25921	{02TB_extension}	not yet	IS56
		02TB2597	0M	25922	5199-25922	{02TB_extension}	not yet	IS57
		02TB2463	0M	25924	5200-25924	{02TB_extension}	not yet	IS58
		02TB2585	0M	25926	5202-25926	{02TB_extension}	not yet	IS59
		02TB2593	0M	26061	5205-26061	{02TB_extension}	not yet	IS60
		02TB2582	0M	26062	5206-26062	{02TB_extension}	not yet	IS61
		02TB2599	0M	26063	5207-26063	{02TB_extension}	not yet	IS62
		02TB2587	0M	26066	5210-26066	{02TB_extension}	not yet	IS63
		02TB2467	0M	26069	5212-26069	{02TB_extension}	not yet	IS64
		02TB2468	0M	26070	5517-26070-2	{02TB_extension}	not yet	IS65
		02TB2411	0M	26071	5213-26071	{02TB_extension}	not yet	IS66
		02TB2410	0M	26072	5214-26072	{02TB_extension}	not yet	IS67
		02TB2336	0M	26076	5217-26076	{02TB_extension}	not yet	IS68
		02TB2335	0M	26077	5218-26077	{02TB_extension}	not yet	IS69
		02TB2512	0M	26079	No WGS	No WGS		IS70
		02TB2603	0M	26082	5222-26082	{02TB_extension}	not yet	IS71
		02TB2602	0M	26083	5223-26083	{02TB_extension}	not yet	IS72
		02TB2590	0M	26084	5224-26084	{02TB_extension}	not yet	IS73
		02TB2601	0M	26085	5225-26085	{02TB_extension}	not yet	IS74
		02TB2277	0M	26087	5227-26087	{02TB_extension}	not yet	IS75
		02TB2278	0M	26088	5228-26088	{02TB_extension}	not yet	IS76
		02TB2339	0M	26090	5230-26090	{02TB_extension}	not yet	IS77
		02TB2608	0M	26092	5232-26092	{02TB_extension}	not yet	IS78
		02TB2413	0M	26097	5236-26097	{02TB_extension}	not yet	IS79
		02TB2415	0M	26100	5239-26100	{02TB_extension}	not yet	IS80
		02TB2471	0M	26101	5240-26101	{02TB_extension}	not yet	IS81
		02TB2610	0M	26104	5243-26104	{02TB_extension}	not yet	IS82
		02TB2474	0M	26106	5244-26106	{02TB_extension}	not yet	IS83
		02TB2614	0M	26107	5245-26107	{02TB_extension}	not yet	IS84
		02TB2615	0M	26109	5247-26109	{02TB_extension}	not yet	IS85
		02TB2421	0M	26110	5248-26110	{02TB_extension}	not yet	IS86
		02TB2419	0M	26111	5249-26111	{02TB_extension}	not yet	IS87
		02TB2514	0M	26113	5251-26113	{02TB_extension}	not yet	IS88
		02TB2616	0M	26114	5252-26114	{02TB_extension}	not yet	IS89
		02TB2618	0M	26115	5253-26115	{02TB_extension}	not yet	IS90
		02TB2282	0M	26116	5254-26116	{02TB_extension}	not yet	IS91
		02TB2619	0M	26191	5261-26191	{02TB_extension}	not yet	IS92
		02TB2285	0M	26194	5264-26194	{02TB_extension}	not yet	IS93
		02TB2428	0M	26197	5267-26197	{02TB_extension}	not yet	IS94
		02TB2345	0M	26200	5270-26200	{02TB_extension}	not yet	IS97
		02TB2623	0M	26202	5641-26202-2	{02TB_extension}	not yet	IS99
		02TB2429	0M	26255	5273-26255	{02TB_extension}	not yet	IS100
		02TB2626	0M	26266	4786-WMB634	{02TB_extension}	not yet	IS101
		02TB2436	0M	26269	4789-WMB637	{02TB_extension}	not yet	IS103
		02TB2632	0M	26280	4800-WMB648	{02TB_extension}	not yet	IS104
		02TB2635	0M	26295	4814-WMB663	{02TB_extension}	not yet	IS105
		02TB2295	0M	26318	4835-WMB685	{02TB_extension}	not yet	IS106
		02TB2360	0M	26321	4838-WMB688	{02TB_extension}	not yet	IS107
		02TB2297	0M	26329	4845-WMB696	{02TB_extension}	not yet	IS108
		02TB2568	0M	26336	No WGS	No WGS		IS109
		02TB2628	0M	26439	4866-WMB719	{02TB_extension}	not yet	IS110
		02TB2681	0M	26443	4870-WMB723	{02TB_extension}	not yet	IS111
		02TB2685	0M	26448	4874-WMB728	{02TB_extension}	not yet	IS112
		02TB2672	0M	26458	4884-WMB738	{02TB_extension}	not yet	IS113
		02TB2306	0M	26483	4908-WMB763	{02TB_extension}	not yet	IS114
		02TB2367	0M	26514	4922-WMB778	{02TB_extension}	not yet	IS115
		02TB2363	0M	26521	4928-WMB785	{02TB_extension}	not yet	IS116
		02TB2706	0M	26530	4936-WMB794	{02TB_extension}	not yet	IS117
		02TB2533	0M	26542	4948-WMB806	{02TB_extension}	not yet	IS118
		02TB2316	0M	26560	No WGS	No WGS		IS119
		02TB1092	24M	25179	10353-25179_S9	{02TBsequential}	no	MDR1	PRJEB78540
		02TB1092	0M	20525	9817-SRR5067309	{02TB_HoltEtAl,sequential}	PRJNA355614	MDR2	PRJEB78540
		02TB1964	1M	21555	10296-21555_S1	{02TBsequential}	no	MDR3	PRJEB78540
		02TB1964	5M	23172	10333-23172_S18	{02TBsequential}	no	MDR4	PRJEB78540
		02TB1964	0M	21925	9111-SRR5065336	{02TB_HoltEtAl,sequential}	PRJNA355614	MDR5	PRJEB78540
		02TB0119	2M	17106	9997-17106_S3	{02TBsequential}	no	MDR6	PRJEB78540

## Sheet: Upload_sequence
	sample	OUCRU_robot	sample_ENA	study	instrument_model	library_name	library_source	library_selection	library_strategy	library_layout	forward_file_name	forward_file_md5	reverse_file_name	reverse_file_md5
	IR1	9688-SRR5074128	ERS20804188	PRJEB78540	Illumina MiSeq	Nextera XT	GENOMIC	RANDOM	WGS	PAIRED	9688-SRR5074128_1.fastq.gz	6b4300ca0327a0c9433f0d6ca7af15da	9688-SRR5074128_2.fastq.gz	93ad64db86e21c8e2f7001f8fea41f0a
	IR2	9642-SRR5073782	ERS20804189	PRJEB78540	Illumina MiSeq	Nextera XT	GENOMIC	RANDOM	WGS	PAIRED	9642-SRR5073782_1.fastq.gz	8a421ddb5d802ce238fc94c28c53dff9	9642-SRR5073782_2.fastq.gz	031f085f838608692ac5dfbe444280c5
	IR3	3742-02MTB0334	ERS20804190	PRJEB78540	Illumina MiSeq	Nextera XT	GENOMIC	RANDOM	WGS	PAIRED	3742-02MTB0334_1.fastq.gz	d1bf4df6e9c14a4279e3c4d5fe292665	3742-02MTB0334_2.fastq.gz	d39e6a02d5b2fe3a43efd2efd2185fae
	IR4	3838-02MTB0449	ERS20804191	PRJEB78540	Illumina MiSeq	Nextera XT	GENOMIC	RANDOM	WGS	PAIRED	3838-02MTB0449_1.fastq.gz	89448836273fb64ac5081720fd70114b	3838-02MTB0449_2.fastq.gz	c7b0e96437e67336e5e25eded35a9a41
	IR5	3924-02MTB0552	ERS20804192	PRJEB78540	Illumina MiSeq	Nextera XT	GENOMIC	RANDOM	WGS	PAIRED	3924-02MTB0552_1.fastq.gz	eedc1b835bd1adf0d433058c1829d7f0	3924-02MTB0552_2.fastq.gz	fcdbc97b6c1fa67a2f841295bde31e53
	IR6	4171-02MTB0847	ERS20804193	PRJEB78540	Illumina MiSeq	Nextera XT	GENOMIC	RANDOM	WGS	PAIRED	4171-02MTB0847_1.fastq.gz	062f487eb629072610a4bda01321a6f3	4171-02MTB0847_2.fastq.gz	840846557f32a32d14a70bfb8a2958ce
	IR7	4275-02MTB0959	ERS20804194	PRJEB78540	Illumina MiSeq	Nextera XT	GENOMIC	RANDOM	WGS	PAIRED	4275-02MTB0959_1.fastq.gz	e338c0590ad7c9357ee49cc906f9ded1	4275-02MTB0959_2.fastq.gz	7d7ca00df3568e4a429c7ed942685711
	IR10	9057-SRR5065269	ERS20804195	PRJEB78540	Illumina MiSeq	Nextera XT	GENOMIC	RANDOM	WGS	PAIRED	9057-SRR5065269_1.fastq.gz	6d3fbe66ebf329065e002fb07650e7c2	9057-SRR5065269_2.fastq.gz	e794a683b4892941acbffb79caaabb06
	IR11	9368-SRR5065665	ERS20804196	PRJEB78540	Illumina MiSeq	Nextera XT	GENOMIC	RANDOM	WGS	PAIRED	9368-SRR5065665_1.fastq.gz	18fda63ac79a93605931f34ff6fdadde	9368-SRR5065665_2.fastq.gz	de6b988cbdb1d16b062c1cecd2b4bc89
	IR12	9269-SRR5065542	ERS20804197	PRJEB78540	Illumina MiSeq	Nextera XT	GENOMIC	RANDOM	WGS	PAIRED	9269-SRR5065542_1.fastq.gz	08cdb421bc4c7bd8b992e116f4235223	9269-SRR5065542_2.fastq.gz	29fcf132408d9fdb4f991fb148d00588
	IR13	9747-SRR5065400	ERS20804198	PRJEB78540	Illumina MiSeq	Nextera XT	GENOMIC	RANDOM	WGS	PAIRED	9747-SRR5065400_1.fastq.gz	c2470d89200c4bc619c952eab164801f	9747-SRR5065400_2.fastq.gz	87ba93ecadf47d18596cc6d7b05a044f
	IR14	9143-SRR5065376	ERS20804199	PRJEB78540	Illumina MiSeq	Nextera XT	GENOMIC	RANDOM	WGS	PAIRED	9143-SRR5065376_1.fastq.gz	5bdf7e13d773a69fe55524ea95a0d255	9143-SRR5065376_2.fastq.gz	ba729a977fb36475b03f9b2c04c85c20
	IR15	9310-SRR5065593	ERS20804200	PRJEB78540	Illumina MiSeq	Nextera XT	GENOMIC	RANDOM	WGS	PAIRED	9310-SRR5065593_1.fastq.gz	292c95fbcc53305d38b8de3c8bce2924	9310-SRR5065593_2.fastq.gz	5b9f768c1e16ff4afd92cd0e5157fdd2
	IR16	9049-SRR5065260	ERS20804201	PRJEB78540	Illumina MiSeq	Nextera XT	GENOMIC	RANDOM	WGS	PAIRED	9049-SRR5065260_1.fastq.gz	c332bc2de03dba6525141e33821f7e01	9049-SRR5065260_2.fastq.gz	8fd3dd1e53ac60b7d391ea8dfac7c599
	IR17	9353-SRR5065645	ERS20804202	PRJEB78540	Illumina MiSeq	Nextera XT	GENOMIC	RANDOM	WGS	PAIRED	9353-SRR5065645_1.fastq.gz	18fb0dc1e0f11570f39d8a31fdb3cd12	9353-SRR5065645_2.fastq.gz	a978be76cda65c76c0400f5bc386f543
	IR18	9300-SRR5065581	ERS20804203	PRJEB78540	Illumina MiSeq	Nextera XT	GENOMIC	RANDOM	WGS	PAIRED	9300-SRR5065581_1.fastq.gz	468a7da58d36a6a00f2c9bd34be7925c	9300-SRR5065581_2.fastq.gz	efa69cccc7ae99672749dacb674c2d30
	IR19	9324-SRR5065611	ERS20804204	PRJEB78540	Illumina MiSeq	Nextera XT	GENOMIC	RANDOM	WGS	PAIRED	9324-SRR5065611_1.fastq.gz	f2a9d7e5a66399e96b8ab0fb64930822	9324-SRR5065611_2.fastq.gz	84e0f79a63ac94b9c1788be79afa9d6f
	IR20	9222-SRR5065482	ERS20804205	PRJEB78540	Illumina MiSeq	Nextera XT	GENOMIC	RANDOM	WGS	PAIRED	9222-SRR5065482_1.fastq.gz	5cde822a3f0e6b455b742a639033b61c	9222-SRR5065482_2.fastq.gz	ed8d268aa4960010c7910a5b8808b1e6
	IR21	9093-SRR5065313	ERS20804206	PRJEB78540	Illumina MiSeq	Nextera XT	GENOMIC	RANDOM	WGS	PAIRED	9093-SRR5065313_1.fastq.gz	fc0230df5038eabe1ae66af6052d2f24	9093-SRR5065313_2.fastq.gz	02c9ee1d212a118892da145007e8233f
	IR23	9655-SRR5073892	ERS20804207	PRJEB78540	Illumina MiSeq	Nextera XT	GENOMIC	RANDOM	WGS	PAIRED	9655-SRR5073892_1.fastq.gz	afffc36f6bb1ac95ba0c9a80fc27da49	9655-SRR5073892_2.fastq.gz	91b56f4f448a636b405589097121e388
	IR24	3712-02MTB0294	ERS20804208	PRJEB78540	Illumina MiSeq	Nextera XT	GENOMIC	RANDOM	WGS	PAIRED	3712-02MTB0294_1.fastq.gz	82a1499ada3f17d15a0f70b70df922af	3712-02MTB0294_2.fastq.gz	1d86df02837168c77197088a1ac16de8
	IR25	3859-02MTB0475	ERS20804209	PRJEB78540	Illumina MiSeq	Nextera XT	GENOMIC	RANDOM	WGS	PAIRED	3859-02MTB0475_1.fastq.gz	6f0013a56f59ce5118dcf41c804c4d0d	3859-02MTB0475_2.fastq.gz	7414e3945c5cdf853acd0f9b90b88817
	IR26	3937-02MTB0564	ERS20804210	PRJEB78540	Illumina MiSeq	Nextera XT	GENOMIC	RANDOM	WGS	PAIRED	3937-02MTB0564_1.fastq.gz	3515e178d3101c1f2edd5559c5c86a57	3937-02MTB0564_2.fastq.gz	d928567406da54378909082055e81e9c
	IR27	4049-02MTB0695	ERS20804211	PRJEB78540	Illumina MiSeq	Nextera XT	GENOMIC	RANDOM	WGS	PAIRED	4049-02MTB0695_1.fastq.gz	ea809b78f6721ba09133b4f342d78e42	4049-02MTB0695_2.fastq.gz	e770bd31b9653958d4b9a9d53005c69e
	IR28	9820-SRR5067328	ERS20804212	PRJEB78540	Illumina MiSeq	Nextera XT	GENOMIC	RANDOM	WGS	PAIRED	9820-SRR5067328_1.fastq.gz	a02925baf5b6b4027f6035d7ad62faf8	9820-SRR5067328_2.fastq.gz	cc67e2eef04a6286bc48a7c2867b428d
	IR29	9808-SRR5067240	ERS20804213	PRJEB78540	Illumina MiSeq	Nextera XT	GENOMIC	RANDOM	WGS	PAIRED	9808-SRR5067240_1.fastq.gz	f45b68a8b493594ab7fd16fd0ff149b2	9808-SRR5067240_2.fastq.gz	4d078ec09ca2ff7b63b518ac1839c45b
	IR30	9805-SRR5067221	ERS20804214	PRJEB78540	Illumina MiSeq	Nextera XT	GENOMIC	RANDOM	WGS	PAIRED	9805-SRR5067221_1.fastq.gz	19baa22ddc075979e55af3a7ce21e671	9805-SRR5067221_2.fastq.gz	173b87912e1f42ca7af860da83156d24
	IR31	9816-SRR5067300	ERS20804215	PRJEB78540	Illumina MiSeq	Nextera XT	GENOMIC	RANDOM	WGS	PAIRED	9816-SRR5067300_1.fastq.gz	394e34d613e5b26f74b0af20376138ac	9816-SRR5067300_2.fastq.gz	183e03f4f47705f88cbc2d4cd29f08b3
	IR32	9581-SRR5067623	ERS20804216	PRJEB78540	Illumina MiSeq	Nextera XT	GENOMIC	RANDOM	WGS	PAIRED	9581-SRR5067623_1.fastq.gz	ade58a34fae911206c5c90c10c5b12fc	9581-SRR5067623_2.fastq.gz	2dcd1944f7c03dd9ca0b27736a1acafd
	IR33	9442-SRR5067303	ERS20804217	PRJEB78540	Illumina MiSeq	Nextera XT	GENOMIC	RANDOM	WGS	PAIRED	9442-SRR5067303_1.fastq.gz	d561d83a37662f94231e17772d29d900	9442-SRR5067303_2.fastq.gz	3e04ed4757f4344ab6556d57e72a9f7c
	IR34	9548-SRR5067549	ERS20804218	PRJEB78540	Illumina MiSeq	Nextera XT	GENOMIC	RANDOM	WGS	PAIRED	9548-SRR5067549_1.fastq.gz	8b980ec443ac81316fafc68c3382c454	9548-SRR5067549_2.fastq.gz	7a0b637907d932006232b8c2cacbe5ff
	IR36	9159-SRR5065410	ERS20804219	PRJEB78540	Illumina MiSeq	Nextera XT	GENOMIC	RANDOM	WGS	PAIRED	9159-SRR5065410_1.fastq.gz	edc090554eb5abba5f815aeecc42b79c	9159-SRR5065410_2.fastq.gz	5f4f6b1b9762b6c0bad11abcfcc92a46
	IR37	9735-SRR5065361	ERS20804220	PRJEB78540	Illumina MiSeq	Nextera XT	GENOMIC	RANDOM	WGS	PAIRED	9735-SRR5065361_1.fastq.gz	1d0f8e3e5878db25b7d4c93fbcd89f43	9735-SRR5065361_2.fastq.gz	4faadedec133ecf399788d400e5ace10
	IR38	9004-SRR5065206	ERS20804221	PRJEB78540	Illumina MiSeq	Nextera XT	GENOMIC	RANDOM	WGS	PAIRED	9004-SRR5065206_1.fastq.gz	4dca04418c2ee6d1a791e5dc4760f1f9	9004-SRR5065206_2.fastq.gz	a1383b25cf0c4e45f64782b52481d781
	IR39	9346-SRR5065637	ERS20804222	PRJEB78540	Illumina MiSeq	Nextera XT	GENOMIC	RANDOM	WGS	PAIRED	9346-SRR5065637_1.fastq.gz	d5e76850bb7cdfd84ce70881e59dd5b5	9346-SRR5065637_2.fastq.gz	8e2a7e7898bbc88a53215be984c14cd7
	IR40	10324-22656_S13	ERS20804223	PRJEB78540	Illumina MiSeq	Nextera XT	GENOMIC	RANDOM	WGS	PAIRED	10324-22656_S13_1.fastq.gz	a2d11d2e53565ef93440755bd9aa6246	10324-22656_S13_2.fastq.gz	46d07e2d5b86192264123cfacd700fa8
	IR41	10338-23445_S34	ERS20804224	PRJEB78540	Illumina MiSeq	Nextera XT	GENOMIC	RANDOM	WGS	PAIRED	10338-23445_S34_1.fastq.gz	3c4da0635f4ab77ef901896a4c4370dd	10338-23445_S34_2.fastq.gz	ef06385cd2f7f205012e79dc02a2c50d
	IR44	10040-17532_S17	ERS20804225	PRJEB78540	Illumina MiSeq	Nextera XT	GENOMIC	RANDOM	WGS	PAIRED	10040-17532_S17_1.fastq.gz	11277321b3096f3c19324186c4493207	10040-17532_S17_2.fastq.gz	17c21cfc2a5852f6722db1275224911b
	IR46	10125-18809_S10	ERS20804226	PRJEB78540	Illumina MiSeq	Nextera XT	GENOMIC	RANDOM	WGS	PAIRED	10125-18809_S10_1.fastq.gz	88116bc4d1efc3072993006bca6d72e4	10125-18809_S10_2.fastq.gz	a22be6d5f1f7c71cd82baaa010554466
	IR47	10211-20645_S16	ERS20804227	PRJEB78540	Illumina MiSeq	Nextera XT	GENOMIC	RANDOM	WGS	PAIRED	10211-20645_S16_1.fastq.gz	12a6b4d605145be8ed2a17b256b5ca8f	10211-20645_S16_2.fastq.gz	ddc0b4b4d43705d5226a54e1d8a45efd
	IR48	10140-19235_S13	ERS20804228	PRJEB78540	Illumina MiSeq	Nextera XT	GENOMIC	RANDOM	WGS	PAIRED	10140-19235_S13_1.fastq.gz	a48f94f770ac27bf6045497bff07ee81	10140-19235_S13_2.fastq.gz	ebb836f6fb92f79ca1e292cb194c6e71
	IR51	10201-20324_S13	ERS20804229	PRJEB78540	Illumina MiSeq	Nextera XT	GENOMIC	RANDOM	WGS	PAIRED	10201-20324_S13_1.fastq.gz	d161ad4b0f73c88404cf521f8f589a5b	10201-20324_S13_2.fastq.gz	ff4f5df29d36bab5a9c93e82db67836e
	IR52	10216-20651_S4	ERS20804230	PRJEB78540	Illumina MiSeq	Nextera XT	GENOMIC	RANDOM	WGS	PAIRED	10216-20651_S4_1.fastq.gz	2f9348bf78c4dad9510f2bc7d2727b75	10216-20651_S4_2.fastq.gz	01ce77b9fc956426d9b9f93ca92cac63
	IR53	10323-22196_S26	ERS20804231	PRJEB78540	Illumina MiSeq	Nextera XT	GENOMIC	RANDOM	WGS	PAIRED	10323-22196_S26_1.fastq.gz	f01891164b481dc820e5ea15c1b4737c	10323-22196_S26_2.fastq.gz	3fd2333fe3a9c757f9c33c837e41d7c4
	IR54	10242-20926_S5	ERS20804232	PRJEB78540	Illumina MiSeq	Nextera XT	GENOMIC	RANDOM	WGS	PAIRED	10242-20926_S5_1.fastq.gz	bf6743a8e4ed6fa37cbd618612d5c272	10242-20926_S5_2.fastq.gz	b67befbc4a2af96a7d8a9cac01438eec
	IR55	10168-19777_S17	ERS20804233	PRJEB78540	Illumina MiSeq	Nextera XT	GENOMIC	RANDOM	WGS	PAIRED	10168-19777_S17_1.fastq.gz	2976c974ba8127f46ca1b4a0670290e6	10168-19777_S17_2.fastq.gz	478539b09031dc31ccb11a518a48cb60
	IR56	10352-24897_S8	ERS20804234	PRJEB78540	Illumina MiSeq	Nextera XT	GENOMIC	RANDOM	WGS	PAIRED	10352-24897_S8_1.fastq.gz	dcefe52dc5094da8e80db9d12c6c736d	10352-24897_S8_2.fastq.gz	c8c89a9439d9d10d5aea7e2a7425a713
	IR57	10210-20644_S15	ERS20804235	PRJEB78540	Illumina MiSeq	Nextera XT	GENOMIC	RANDOM	WGS	PAIRED	10210-20644_S15_1.fastq.gz	b61bdeb9f0860974700fb521b89aaa8a	10210-20644_S15_2.fastq.gz	a4aef472cb35e0b30481c8eae079b01b
	IR58	10329-22966_S30	ERS20804236	PRJEB78540	Illumina MiSeq	Nextera XT	GENOMIC	RANDOM	WGS	PAIRED	10329-22966_S30_1.fastq.gz	4ec942212cc5ae428496e65f3e7dfea9	10329-22966_S30_2.fastq.gz	8a608818d6c55c5ef5ec1829f553ffe1
	IR59	10229-20771_S12	ERS20804237	PRJEB78540	Illumina MiSeq	Nextera XT	GENOMIC	RANDOM	WGS	PAIRED	10229-20771_S12_1.fastq.gz	74568905a70af6b16c94644d24ba277e	10229-20771_S12_2.fastq.gz	37ad3c66750d87cd7b835bf933c31f24
	IR60	10325-22657_S27	ERS20804238	PRJEB78540	Illumina MiSeq	Nextera XT	GENOMIC	RANDOM	WGS	PAIRED	10325-22657_S27_1.fastq.gz	101a3bbd899e9c72cef4629d3014a475	10325-22657_S27_2.fastq.gz	28ebc36a96b392736c9c111ee57eef50
	IR61	10343-23836_S2	ERS20804239	PRJEB78540	Illumina MiSeq	Nextera XT	GENOMIC	RANDOM	WGS	PAIRED	10343-23836_S2_1.fastq.gz	2d34f2f42fd743c32f0ec458052de661	10343-23836_S2_2.fastq.gz	44cb9b2ed1e1ee80a9f05a71f3373e14
	IR62	10354-25180_S19	ERS20804240	PRJEB78540	Illumina MiSeq	Nextera XT	GENOMIC	RANDOM	WGS	PAIRED	10354-25180_S19_1.fastq.gz	0515de1ad6f1d783064f11dca68ed05a	10354-25180_S19_2.fastq.gz	d343a3361c24336f50d382571d44f4df
	IR63	10286-21397_S14	ERS20804241	PRJEB78540	Illumina MiSeq	Nextera XT	GENOMIC	RANDOM	WGS	PAIRED	10286-21397_S14_1.fastq.gz	99c58b188948c087db28eb3090d7a4a7	10286-21397_S14_2.fastq.gz	45a50002a1f211033fca523d67a94abe
	IR64	10350-24551_S18	ERS20804242	PRJEB78540	Illumina MiSeq	Nextera XT	GENOMIC	RANDOM	WGS	PAIRED	10350-24551_S18_1.fastq.gz	bf38df0d02dfa4721788126f21051599	10350-24551_S18_2.fastq.gz	40ac23c6c8d585e9c9eb83b20f39d70a
	IR65	10318-22191_S11	ERS20804243	PRJEB78540	Illumina MiSeq	Nextera XT	GENOMIC	RANDOM	WGS	PAIRED	10318-22191_S11_1.fastq.gz	98c9bae545a3f1fa62fd1c95225863c9	10318-22191_S11_2.fastq.gz	3fff27ba9cb4b906fdbd71cf9ac7d66e
	IR67	10076-18029_S21	ERS20804244	PRJEB78540	Illumina MiSeq	Nextera XT	GENOMIC	RANDOM	WGS	PAIRED	10076-18029_S21_1.fastq.gz	b73020f11e3202002cf2995202bdaa06	10076-18029_S21_2.fastq.gz	65c215a31c38f04de0fef27c90c27b9b
	IR68	10082-18333_S23	ERS20804245	PRJEB78540	Illumina MiSeq	Nextera XT	GENOMIC	RANDOM	WGS	PAIRED	10082-18333_S23_1.fastq.gz	34c0957b693ae5921d987a79fe637674	10082-18333_S23_2.fastq.gz	e7931ec30910260883a60dcaf2343280
	IR69	4233-02MTB0912	ERS20804246	PRJEB78540	Illumina MiSeq	Nextera XT	GENOMIC	RANDOM	WGS	PAIRED	4233-02MTB0912_1.fastq.gz	7c3e6cc8606499f124c85ae977c5b4f2	4233-02MTB0912_2.fastq.gz	3d76db04a009c246ccc5409141f4c947
	IR71	10158-19773_S17	ERS20804247	PRJEB78540	Illumina MiSeq	Nextera XT	GENOMIC	RANDOM	WGS	PAIRED	10158-19773_S17_1.fastq.gz	b8bc847dadea7b424bb28206b8916891	10158-19773_S17_2.fastq.gz	b3cae9bae100198457cced57470828fd
	IR72	9263-SRR5065534	ERS20804248	PRJEB78540	Illumina MiSeq	Nextera XT	GENOMIC	RANDOM	WGS	PAIRED	9263-SRR5065534_1.fastq.gz	9340216e74dea0bb7473fe9ca78fec69	9263-SRR5065534_2.fastq.gz	700056e868488b0d2027359c35c9a987
	IR73	9006-SRR5065209	ERS20804249	PRJEB78540	Illumina MiSeq	Nextera XT	GENOMIC	RANDOM	WGS	PAIRED	9006-SRR5065209_1.fastq.gz	d47b1017f153366bc7eddc9956fbc519	9006-SRR5065209_2.fastq.gz	7581bfc7333e672232832dd12d103e1d
	IR74	9074-SRR5065292	ERS20804250	PRJEB78540	Illumina MiSeq	Nextera XT	GENOMIC	RANDOM	WGS	PAIRED	9074-SRR5065292_1.fastq.gz	bace2db6a22b16461451aa2a0b6039db	9074-SRR5065292_2.fastq.gz	f8506ddd86545edce8cb1dfa991c428c
	IR75	10020-17342_S16	ERS20804251	PRJEB78540	Illumina MiSeq	Nextera XT	GENOMIC	RANDOM	WGS	PAIRED	10020-17342_S16_1.fastq.gz	3c20c3fb3489fd247914dbb1874dd687	10020-17342_S16_2.fastq.gz	2c3de0def3bbbd09a9b3d438309ea023
	IR78	9858-SRR5067611	ERS20804252	PRJEB78540	Illumina MiSeq	Nextera XT	GENOMIC	RANDOM	WGS	PAIRED	9858-SRR5067611_1.fastq.gz	ee05cb307a435269029f8baca4f172a0	9858-SRR5067611_2.fastq.gz	de7c521163924576e030965f55bed80e
	IR79	10179-20000_S7	ERS20804253	PRJEB78540	Illumina MiSeq	Nextera XT	GENOMIC	RANDOM	WGS	PAIRED	10179-20000_S7_1.fastq.gz	6d58430b3f2dce5e6fed66bcf0c08b3a	10179-20000_S7_2.fastq.gz	b2f97698b21ad85532f70cdcc57aa5e2
	IR80	10270-21233_S14	ERS20804254	PRJEB78540	Illumina MiSeq	Nextera XT	GENOMIC	RANDOM	WGS	PAIRED	10270-21233_S14_1.fastq.gz	00937ff658f95720805839d50247c54d	10270-21233_S14_2.fastq.gz	4d102f5fa7879f00b4f01d8c789a659e
	IR81	10213-20646_S1	ERS20804255	PRJEB78540	Illumina MiSeq	Nextera XT	GENOMIC	RANDOM	WGS	PAIRED	10213-20646_S1_1.fastq.gz	12b03ea00a567b2a640c69e227745289	10213-20646_S1_2.fastq.gz	7673fb5a22b823d16647d8438b6c924c
	IR82	9162-SRR5065414	ERS20804256	PRJEB78540	Illumina MiSeq	Nextera XT	GENOMIC	RANDOM	WGS	PAIRED	9162-SRR5065414_1.fastq.gz	e68ffe69711df25a1790be107acce286	9162-SRR5065414_2.fastq.gz	13bbbc1537cf8ffe88a89e273beb8531
	IR83	10344-23837_S3	ERS20804257	PRJEB78540	Illumina MiSeq	Nextera XT	GENOMIC	RANDOM	WGS	PAIRED	10344-23837_S3_1.fastq.gz	7084c8117dfd7b8a7d199d01597b030e	10344-23837_S3_2.fastq.gz	cd1a03bb209aad50858f5bf2c24b2754
	IR84	9750-SRR5065406	ERS20804258	PRJEB78540	Illumina MiSeq	Nextera XT	GENOMIC	RANDOM	WGS	PAIRED	9750-SRR5065406_1.fastq.gz	cc9890c158769ecba64e550a310a9ccb	9750-SRR5065406_2.fastq.gz	d11f44e49abbdb476d88d50a00cd59ed
	MDR1	10353-25179_S9	ERS20804259	PRJEB78540	Illumina MiSeq	Nextera XT	GENOMIC	RANDOM	WGS	PAIRED	10353-25179_S9_1.fastq.gz	e1ac4f3c3c7b08730162e97261a7c7cd	10353-25179_S9_2.fastq.gz	925aee77ca323df94dce098715d5241b
	MDR2	9817-SRR5067309	ERS20804260	PRJEB78540	Illumina MiSeq	Nextera XT	GENOMIC	RANDOM	WGS	PAIRED	9817-SRR5067309_1.fastq.gz	781364be306da3b5c5261eea8841559e	9817-SRR5067309_2.fastq.gz	3d34f51df86c0de9aaf6f75199263dda
	MDR3	10296-21555_S1	ERS20804261	PRJEB78540	Illumina MiSeq	Nextera XT	GENOMIC	RANDOM	WGS	PAIRED	10296-21555_S1_1.fastq.gz	7f1139b553f1e6c770e2d29d211f5c2b	10296-21555_S1_2.fastq.gz	8b84e4f119f0ce989bb6888ee6e3fe5c
	MDR4	10333-23172_S18	ERS20804262	PRJEB78540	Illumina MiSeq	Nextera XT	GENOMIC	RANDOM	WGS	PAIRED	10333-23172_S18_1.fastq.gz	f454f5be7ae0403a675209f7e44fe1ee	10333-23172_S18_2.fastq.gz	4d61742f37e4ffb5ec2b4b69fc02488b
	MDR5	9111-SRR5065336	ERS20804263	PRJEB78540	Illumina MiSeq	Nextera XT	GENOMIC	RANDOM	WGS	PAIRED	9111-SRR5065336_1.fastq.gz	6818b444f02dd474f09e9975005aa4ac	9111-SRR5065336_2.fastq.gz	f0a44974c1b70241d05cfbe234adfc9b
	MDR6	9997-17106_S3	ERS20804264	PRJEB78540	Illumina MiSeq	Nextera XT	GENOMIC	RANDOM	WGS	PAIRED	9997-17106_S3_1.fastq.gz	5f158afba9ba2b6322b3083faf805b88	9997-17106_S3_2.fastq.gz	ff0283d028d169d89d3c17339b0525bb
